# Supplementary material for: Mono- and bis-Pd(ii) complexes of N-confused dithiahexaphyrin(1.1.1.1.1.0) with the absorption and aromaticity modulated by Pd(ii) coordination, macrocycle contraction and ancillary ligands
Source: Royal Society of Chemistry journal article supplement (doi:10.1039/d3sc05473j), 2024-01-01
Supplement: d3sc05473j1.pdf [file d3sc05473j1.pdf]

## Electronic Supporting Information

### **Mono- and bis-Pd(II) complexes of N-confused dithiahexaphyrin (1.1.1.1.0) with the absorption and aromaticity modulated by Pd(II) coordination, macrocycle contraction and ancillary ligands**

Meng Sun,<sup>a</sup> Yongshu Xie<sup>\*a,b</sup>, Glib Baryshnikov,<sup>c</sup> Chengjie Li,<sup>a</sup> Feng Sha,<sup>a</sup> Xinyan Wu,<sup>a</sup> Hans Ågren,<sup>d</sup> Shijun Li,<sup>b</sup> and Qizhao Li <sup>\*a</sup>

<sup>a</sup> Key Laboratory for Advanced Materials and Joint International Research Laboratory of Precision Chemistry and Molecular Engineering, Feringa Nobel Prize Scientist Joint Research Center, Frontiers Science Center for Materiobiology and Dynamic Chemistry, Institute of Fine Chemicals, School of Chemistry and Molecular Engineering, East China University of Science and Technology, Shanghai 200237, China.

<sup>b</sup> College of Material, Chemistry and Chemical Engineering, Key Laboratory of Organosilicon Chemistry and Material Technology of Ministry of Education, Hangzhou Normal University, Hangzhou, 311121, China.

<sup>c</sup> Department of Science and Technology, Laboratory of Organic Electronics, Linköping University, Norrköping, SE-60174, Sweden.

<sup>d</sup> Department of Physics and Astronomy, Uppsala University, SE-751 20 Uppsala, Sweden.

\*E-mail: yshxie@ecust.edu.cn; zhaolq@ecust.edu.cn. Tel: (+86) 21-6425-3530

#### CONTENTS

|                                                                                                                             |       |
|-----------------------------------------------------------------------------------------------------------------------------|-------|
| <b>Experimental</b> .....                                                                                                   | 1-6   |
| <b>Figure S1-S7.</b> HRMS of <b>a</b> and <b>1 – 5</b> .....                                                                | 7-10  |
| <b>Figure S8.</b> The plausible reaction mechanism for generating <b>5</b> from <b>1</b> .....                              | 10    |
| <b>Figure S9-S10.</b> <sup>1</sup> H NMR and <sup>13</sup> C NMR spectra of <b>a</b> in DMSO- <i>d</i> <sub>6</sub> .....   | 11    |
| <b>Figure S11-S12.</b> <sup>1</sup> H NMR and <sup>13</sup> C NMR spectra of <b>1</b> in CDCl <sub>3</sub> .....            | 12    |
| <b>Figure S13-S14.</b> <sup>1</sup> H NMR and <sup>13</sup> C NMR spectra of <b>2</b> in CDCl <sub>3</sub> .....            | 13    |
| <b>Figure S15-S16.</b> <sup>1</sup> H NMR and <sup>13</sup> C NMR spectra of <b>3</b> in CDCl <sub>3</sub> .....            | 14    |
| <b>Figure S17-S18.</b> <sup>1</sup> H NMR and <sup>13</sup> C NMR spectra of <b>4-Ph</b> in CDCl <sub>3</sub> .....         | 15    |
| <b>Figure S19.</b> <sup>1</sup> H NMR spectrum of <b>4-Cl</b> in CDCl <sub>3</sub> .....                                    | 16    |
| <b>Figure S20-S21.</b> <sup>1</sup> H NMR spectra of <b>5</b> in CDCl <sub>3</sub> and in DMSO- <i>d</i> <sub>6</sub> ..... | 16-17 |
| <b>Figure S22.</b> <sup>13</sup> C NMR spectrum of <b>5</b> in CDCl <sub>3</sub> .....                                      | 17    |
| <b>Table S1.</b> Crystal data and structure refinements for <b>1 – 3</b> , <b>4-Ph</b> and <b>5</b> .....                   | 18    |
| <b>Figure S23-S27.</b> Selected bond lengths (Å) in the crystal structures .....                                            | 19-20 |
| <b>Figure S28-S33.</b> TD-DFT-computed vertical energies with the experimental spectra.....                                 | 21-22 |

---

|                                                                                                                                                      |       |
|------------------------------------------------------------------------------------------------------------------------------------------------------|-------|
| <b>Table S2-S7.</b> Selected computed excitation energies, oscillator strengths and molecular orbital compositions for low-lying excited states..... | 23-25 |
| <b>Table S8.</b> Contour plots of the frontier molecular orbitals.....                                                                               | 26    |
| <b>Table S9.</b> Calculated energy levels of the frontier molecular orbitals .....                                                                   | 26    |
| <b>Figure S34-S39.</b> ACID plots.....                                                                                                               | 27-29 |
| <b>Figure S40.</b> NICS values.....                                                                                                                  | 30    |
| <b>Table S10.</b> Cartesian coordinates of the optimized structures.....                                                                             | 31-53 |
| <b>References</b> .....                                                                                                                              | 54    |

---

## Experimental

### General

Commercially available solvents and reagents were used without further purification unless otherwise mentioned. Intermediate **a** was synthesized by a procedure modified from a reported one,<sup>1</sup> and **b** was synthesized by a reported method.<sup>2</sup> Thin-layer chromatography (TLC) was carried out on glass sheets coated with silica gel 60 F254 (Qingdao Haiyang Chemical Co., Ltd). <sup>1</sup>H NMR spectra were obtained using Bruker AM 400 or Bruker Ascend 600 spectrometers, and the chemical shifts were reported relative to tetramethylsilane (TMS,  $\delta = 0$ ) in ppm. <sup>13</sup>C NMR spectra were recorded at 101 MHz (Bruker AM 400) or 151 MHz (Bruker Ascend 600), and the chemical shifts were reported relative to CDCl<sub>3</sub> ( $\delta = 77.00$ ) or DMSO-*d*<sub>6</sub> ( $\delta = 39.52$ ) in ppm. HRMS were performed using a Waters LCT Premier XE spectrometer or a JEOL-JMS-T100L AccuTOF spectrometer. UV-Vis-NIR absorption spectra were recorded on a Shimadzu UV2600 spectrophotometer and all absorption spectra were recorded at room temperature.

### Crystallography

Single crystals of **1**, **2** and **3** were obtained by the slow recrystallization from the dichloromethane/n-hexane solutions, and crystals of **4-Ph** and **5** were obtained by the slow recrystallization from the dichloromethane/methanol solutions. X-ray analyses were performed on a SMART APEX equipped with CCD detector (Bruker) using MoK $\alpha$  (graphite, monochromated,  $\lambda = 0.71073$  Å). The structures were solved by the direct method of SHELXS-2013/2014 and refined using the SHELXS-2013/2014 program.<sup>3-6</sup> The positional parameters and thermal parameters of non-hydrogen atoms were refined anisotropically on  $F^2$  by the full-matrix least-squares method. Hydrogen atoms were placed at calculated positions and refined riding on their corresponding carbon atoms. CCDC 2277039 (**1**), 2277040 (**2**), 2277041 (**3**), 2277042 (**4-Ph**) and 2277043 (**5**) contain the supplementary crystallographic data for this paper. These data can be obtained free of charge from The Cambridge Crystallographic Data Centre via [www.ccdc.cam.ac.uk/data\\_request/cif](http://www.ccdc.cam.ac.uk/data_request/cif).

### Details for Theoretical Calculations.

Density functional theory (DFT) calculations were carried out using Gaussian 16 program. The optimized structures and molecular orbitals were all calculated at the level of B3LYP.<sup>7,8</sup> The nucleus-independent chemical shift (NICS) calculations were obtained using the GIAO method at the B3LYP/6-31G\* level.<sup>9</sup> The local ring center chosen for determination of the NICS values<sup>10</sup> represent the nonweighted means of the carbon and nitrogen coordinates on the peripheral positions of the macrocycles. ACID contours with the associated vectors were obtained in accord with the continuous set of gauge transformation (CSGT) methods<sup>11</sup>. At the optimized geometries, time-dependent (TD) DFT calculations with the hybrid PBE0 functional<sup>12</sup> were carried out to simulate the absorption spectra. Solvent effects arising from CH<sub>2</sub>Cl<sub>2</sub> were accounted for using the polarizable continuum model (PCM).<sup>13</sup>

## Synthetic Details

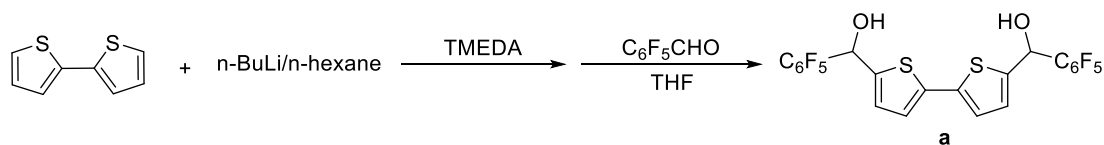

**a:** (5,5'-bis-[(pentafluorophenyl)hydroxymethyl]-2,2'-bithiophene diol): n-Butyllithium (n-BuLi, 2.5 M solution in hexane 18.0 mL, 45.0 mmol) was added to a solution of N,N,N',N'-tetramethylethylenediamine (TMEDA, 6.80 mL, 45.4 mmol) in dry n-hexane (68 mL), followed by addition of bithiophene (3.00 g, 18.0 mmol) in dry THF (10.0 mL) under argon. The reaction mixture was heated under reflux for 1 h. As the reaction proceeded, a white suspension formed indicating the generation of the 5,5'-dilithiated salt of bithiophene. The reaction mixture was cooled to 0 °C in an ice bath and a solution of pentafluorobenzaldehyde (C<sub>6</sub>F<sub>5</sub>CHO, 5.10 mL, 41.8 mmol) in tetrahydrofuran (THF, 10 mL) was added. The reaction mixture was stirred at 0 °C for 15 min and then warmed to room temperature. An ice-cold saturated NH<sub>4</sub>Cl solution (80.0 mL) was added and the reaction mixture was extracted with dichloromethane (40.0 × 4 mL). The organic layers were combined and washed with brine and dried over anhydrous Na<sub>2</sub>SO<sub>4</sub>. After removing the solvent under reduced pressure, the crude product was purified by column chromatography on silica gel columns using petroleum ether (PE)/dichloromethane (DCM) = 1/3 (v/v) as the eluent, **a** was collected as a pale yellow solid (4.53 g, 45%).

**a:** <sup>1</sup>H NMR (400 MHz, DMSO-*d*<sub>6</sub>) δ 7.11 (d, *J* = 3.7 Hz, 2H), 6.94 (d, *J* = 5.1 Hz, 2H, OH), 6.82 (d, *J* = 3.6 Hz, 2H), 6.28 (d, *J* = 4.9 Hz, 2H). <sup>13</sup>C NMR (151 MHz, DMSO-*d*<sub>6</sub>) δ 145.8 (s), 144.6 (d, <sup>1</sup>*J*<sub>CF</sub> = 248 Hz\*), 140.7 (d, <sup>1</sup>*J*<sub>CF</sub> = 252 Hz\*), 137.7 (d, <sup>1</sup>*J*<sub>CF</sub> = 249 Hz\*), 137.6 (d, <sup>1</sup>*J*<sub>CF</sub> = 248 Hz\*), 137.5 (d, <sup>1</sup>*J*<sub>CF</sub> = 248 Hz\*), 136.3 (s), 125.3 (s), 123.9 – 123.7 (m), 117.9, 117.8, 117.7, 62.7 (s). HRMS: *m/z*; [*M*]<sup>+</sup>: calcd for C<sub>22</sub>H<sub>8</sub>F<sub>10</sub>O<sub>2</sub>S<sub>2</sub>: 557.9801; Found: 557.9796.

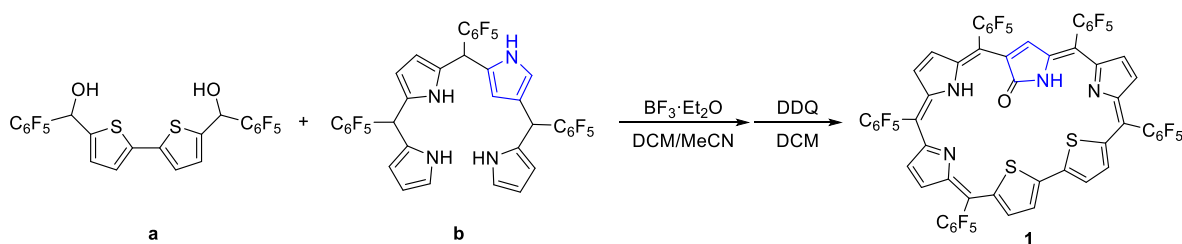

**1:** Boron trifluoride etherate (BF<sub>3</sub>·Et<sub>2</sub>O, 1.90 mL, 15.0 mmol) in DCM (20 mL) was added into the solution of **a** (3.41 g, 6.11 mmol) and **b** (4.81 g, 5.99 mmol) in DCM/MeCN (300/80 mL) under nitrogen atmosphere. After stirring for 2 h, DCM (400 mL) was added to dilute the solution. Then 2,3-dichloro-5,6-dicyano-1,4-benzoquinone (DDQ, 5.44g, 24.0 mmol) was added to the reaction mixture under air, and the solution was stirred for 1 h. Then the reaction mixture was quenched with triethylamine (TEA, 2.08 mL, 15.0 mmol), and the mixture was passed through a basic alumina column to remove tar and residual solids. After the solvent was

removed in vacuo, the raw products were purified on silica gel columns using PE/DCM = 2/1(v/v) as the eluent.

Finally, **1** was obtained as a violet solid (921 mg, 12%)

**1**:  $^1\text{H}$  NMR (400 MHz,  $\text{CDCl}_3$ )  $\delta$  10.69 (d,  $J = 4.6$  Hz, 1H), 10.04 (s, 1H), 9.78 (d,  $J = 4.5$  Hz, 1H), 9.71 (s, 1H), 9.09 (s, 1H), 8.75 (d,  $J = 5.3$  Hz, 1H), 8.70 (t,  $J = 4.6$  Hz, 2H), 8.57 (d,  $J = 4.7$  Hz, 1H), 8.53 (d,  $J = 4.6$  Hz, 1H), 8.34 (d,  $J = 4.8$  Hz, 1H), 1.50 (s, 1H, NH), 1.28 (s, 1H, NH).  $^{13}\text{C}$  NMR (151 MHz,  $\text{CDCl}_3$ )  $\delta$  161.1, 160.6, 159.0, 154.5, 151.42, 146.8 (d,  $^1J_{\text{CF}} = 245$   $\text{Hz}^*$ ), 146.5 (d,  $^1J_{\text{CF}} = 248$   $\text{Hz}^*$ ), 144.7, 143.9, 142.6 (d,  $^1J_{\text{CF}} = 258$   $\text{Hz}^*$ ), 141.5, 140.3, 139.0, 137.7 (d,  $^1J_{\text{CF}} = 252$   $\text{Hz}^*$ ), 137.6, 136.7, 136.4, 135.8, 135.4, 135.3, 134.8, 132.5, 132.2, 131.1, 130.4, 129.5, 128.3, 122.0, 119.1, 118.9, 118.1, 117.8 (d,  $^1J_{\text{CF}} = 266$   $\text{Hz}^*$ ), 113.9 (d,  $^1J_{\text{CF}} = 211$   $\text{Hz}^*$ ), 102.6, 101.6, 99.6. UV/Vis/NIR [ $(\text{CH}_2\text{Cl}_2)$ :  $\lambda_{\text{max}}$  (nm) ( $\epsilon \times 10^5$   $\text{mol}^{-1}\text{dm}^3\text{cm}^{-1}$ ): 552 (3.39), 679 (0.35), 835 (0.07). HRMS:  $m/z$ ;  $[M]^+$ : calcd for  $\text{C}_{59}\text{H}_{13}\text{F}_{25}\text{N}_4\text{OS}_2$ : 1332.0126; Found: 1332.0127.

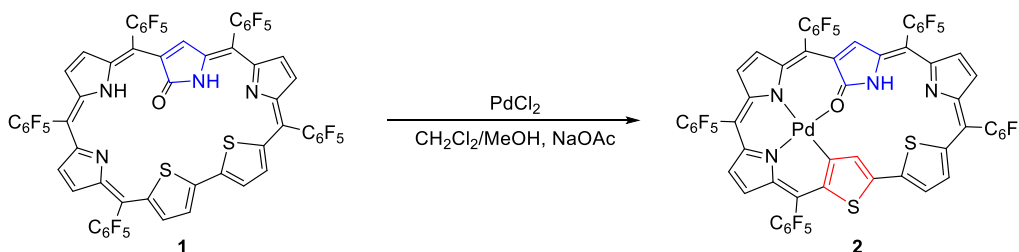

**2**: Palladium(II) dichloride ( $\text{PdCl}_2$ , 102 mg, 0.573 mmol) was added slowly to the solution of **1** (382 mg, 0.287 mmol) in  $\text{DCM}/\text{MeOH}$  (320/80 mL) with sodium acetate ( $\text{NaOAc}$ , 47.0 mg, 0.573 mmol), and the mixture was stirred for 8 h. The reaction mixture was passed through a basic alumina column to remove insoluble solids. After the solvent was removed in vacuo, the raw products were purified on silica gel columns using  $\text{PE}/\text{DCM} = 2/1(\text{v}/\text{v})$  as the eluent. Finally, **2** was obtained as a blue solid (185 mg, 45%).

**2**:  $^1\text{H}$  NMR (400 MHz,  $\text{CDCl}_3$ )  $\delta$  10.49 (d,  $J = 4.6$  Hz, 1H), 10.16 (d,  $J = 4.5$  Hz, 1H), 10.12 (s, 1H), 9.25 (t,  $J = 4.6$  Hz, 2H), 9.12 (d,  $J = 5.0$  Hz, 1H), 9.08 (d,  $J = 4.5$  Hz, 1H), 9.01 (d,  $J = 5.0$  Hz, 1H), 8.94 (d,  $J = 4.5$  Hz, 1H), -0.93 (s, 1H, NH), -2.85 (s, 1H).  $^{13}\text{C}$  NMR (151 MHz,  $\text{CDCl}_3$ )  $\delta$  162.1, 156.7, 153.0, 151.7, 148.4, 147.7, 147.0 (d,  $^1J_{\text{CF}} = 247$   $\text{Hz}^*$ ), 146.6 (d,  $^1J_{\text{CF}} = 248$   $\text{Hz}^*$ ), 146.3 (d,  $^1J_{\text{CF}} = 245$   $\text{Hz}^*$ ), 146.0 (d,  $^1J_{\text{CF}} = 255$   $\text{Hz}^*$ ), 146.1, 145.2, 144.5, 142.8 (d,  $^1J_{\text{CF}} = 244$   $\text{Hz}^*$ ), 142.4, 140.5, 139.1, 138.8, 138.3 (d,  $^1J_{\text{CF}} = 254$   $\text{Hz}^*$ ), 137.7, 137.3, 136.8, 134.8, 133.3, 132.9, 132.4, 131.7, 130.9, 127.0, 123.7, 122.5, 116.3, 114.8 (t,  $^2J_{\text{CF}} = 163$   $\text{Hz}^*$ ), 112.2, 111.5, 105.4, 102.8. UV/Vis/NIR [ $(\text{CH}_2\text{Cl}_2)$ :  $\lambda_{\text{max}}$  (nm) ( $\epsilon \times 10^5$   $\text{mol}^{-1}\text{dm}^3\text{cm}^{-1}$ ): 588 (2.40), 622 (1.41), 737 (0.27), 858 (0.12). HRMS:  $m/z$ ;  $[M]^+$ : calcd for  $\text{C}_{59}\text{H}_{11}\text{F}_{25}\text{N}_4\text{OPdS}_2$ : 1435.9023; Found: 1435.9018.

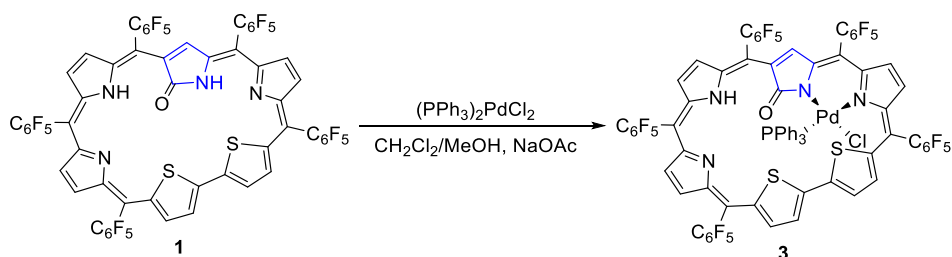

**3:** Bis(triphenylphosphine) palladium(II) dichloride ((PPh<sub>3</sub>)<sub>2</sub>PdCl<sub>2</sub>, 219 mg, 0.312 mmol) was added slowly to the solution of **1** (208 mg, 0.156 mmol) in DCM/MeOH (160/20 mL) with sodium acetate (NaOAc, 26.0 mg, 312 mmol), and the mixture was stirred for 36 h. The reaction mixture was passed through a basic alumina column to remove insoluble solids. After the solvent was removed in vacuo, the raw products were purified on silica gel columns using PE/DCM = 1/1(v/v) as the eluent. Finally, **3** was obtained as a blue solid (65.0 mg, 24%)

**3:** <sup>1</sup>H NMR (400 MHz, CDCl<sub>3</sub>) δ 11.27 (d, *J* = 4.7 Hz, 2H), 10.14 (d, *J* = 4.4 Hz, 2H), 9.62 (s, 1H), 9.18 (d, *J* = 2.3 Hz, 1H), 9.12 (d, *J* = 4.6 Hz, 1H), 8.81 (d, *J* = 4.8 Hz, 1H), 8.67 (d, *J* = 4.6 Hz, 1H), 8.60 (d, *J* = 5.0 Hz, 1H), 8.47 (d, *J* = 4.6 Hz, 1H), 6.22 (s, 3H, Ph-H), 5.41 (s, 6H, Ph-H), 4.29 (s, 6H, Ph-H), 0.28 (s, 1H, NH). <sup>13</sup>C NMR (151 MHz, CDCl<sub>3</sub>) δ 164.2, 158.3, 156.9, 154.3, 152.9, 151.6, 143.9, 142.5 (d, <sup>1</sup>*J*<sub>CF</sub> = 258 Hz\*), 141.8, 139.0, 138.6, 137.8, 137.6 (d, <sup>1</sup>*J*<sub>CF</sub> = 240 Hz\*), 136.1, 135.8, 135.7, 135.4, 135.0, 133.9, 131.4, 131.2, 130.3, 130.0, 129.9, 128.6, 126.4 (d, <sup>1</sup>*J*<sub>CF</sub> = 240 Hz\*), 125.9, 125.9, 121.2, 117.2, 115.5, 106.3, 102.7, 99.3. UV/Vis/NIR [(CH<sub>2</sub>Cl<sub>2</sub>): λ<sub>max</sub> (nm) (ε × 10<sup>5</sup> mol<sup>-1</sup>dm<sup>3</sup>cm<sup>-1</sup>): 589 (1.32), 628 (1.38), 746 (0.33), 882 (0.11)]. HRMS: m/z; [*M*]<sup>+</sup>: calcd for C<sub>77</sub>H<sub>27</sub>ClF<sub>25</sub>N<sub>4</sub>OPPdS<sub>2</sub>: 1733.9784; Found: 1733.9787.

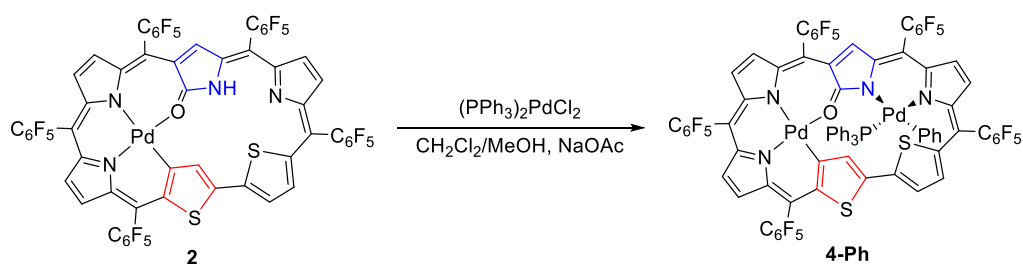

**4-Ph:** Bis(triphenylphosphine) palladium(II) dichloride ((PPh<sub>3</sub>)<sub>2</sub>PdCl<sub>2</sub>, 89.0 mg, 0.127 mmol) was added slowly to the solution of **2** (91.0 mg, 63.0 μmol) in DCM/MeOH (80/20 mL) with sodium acetate (NaOAc, 10.0 mg, 0.127 mmol), and the mixture was stirred for 24 h. The reaction mixture was passed through a basic alumina column to remove insoluble solids. After the solvent was removed in vacuo, the raw products were purified on silica gel columns using PE/DCM = 2/1(v/v) as the eluent. Finally, **4-Ph** was obtained as a green solid (36.0 mg, 31%).

**4-Ph:** <sup>1</sup>H NMR (600 MHz, CDCl<sub>3</sub>) δ 10.75 (d, *J* = 4.3 Hz, 1H), 9.96 – 9.92 (m, 1H), 9.69 (s, 1H), 9.36 (d, *J* = 4.7 Hz, 1H), 9.09 (t, *J* = 5.0 Hz, 2H), 9.01 (d, *J* = 4.8 Hz, 1H), 9.00 – 8.98 (m, 1H), 8.93 (d, *J* = 3.2 Hz, 1H), 6.37 (t,

$J = 7.3$  Hz, 3H, Ph-H), 6.09 (t,  $J = 6.8$  Hz, 1H, Ph-H), 5.88 (t,  $J = 7.1$  Hz, 1H, Ph-H), 5.80 (t,  $J = 6.8$  Hz, 6H, Ph-H), 5.47 (t,  $J = 7.3$  Hz, 1H, Ph-H), 4.52 (d,  $J = 6.4$  Hz, 1H, Ph-H), 4.06 (dd,  $J = 11.0, 8.0$  Hz, 6H, Ph-H), 2.30 – 2.25 (m, 1H, Ph-H), -3.78 (s, 1H).  $^{13}\text{C}$  NMR (151 MHz,  $\text{CDCl}_3$ )  $\delta$  170.3, 156.4, 155.8, 149.7, 149.4, 147.2, 146.3 (d,  $^1J_{\text{CF}} = 240$  Hz\*), 145.9, 145.3, 144.0 (t,  $^2J_{\text{CF}} = 60$  Hz\*), 143.6, 143.1, 142.6, 142.6, 138.4 (d,  $^1J_{\text{CF}} = 258$  Hz\*), 138.0, 137.5 (d,  $^1J_{\text{CF}} = 253$  Hz\*), 137.4, 136.1, 136.0, 134.5, 133.8, 132.8, 132.3, 132.2, 131.3, 131.2, 131.1, 130.8, 130.3, 128.3, 127.5, 127.3, 126.9, 126.6, 126.3, 126.0, 125.9, 124.5, 124.1, 121.9, 116.4, 114.4, 112.9, 109.3, 108.8, 102.8. UV/Vis/NIR [ $(\text{CH}_2\text{Cl}_2)$ :  $\lambda_{\text{max}}$  (nm) ( $\epsilon \times 10^5 \text{ mol}^{-1}\text{dm}^3\text{cm}^{-1}$ ): 622 (3.70), 760 (0.46), 870 (0.30). 984 (0.61). HRMS:  $m/z$ ;  $[M]^+$ : calcd for  $\text{C}_{83}\text{H}_{30}\text{F}_{25}\text{N}_4\text{OPd}_2\text{S}_2$ : 1879.9297; Found: 1879.9299.

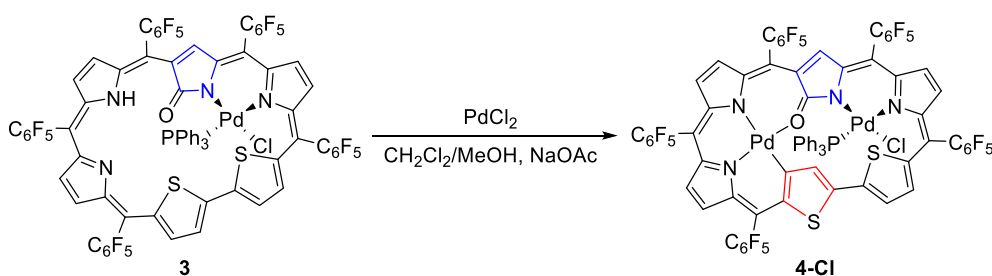

**4-Cl:** Palladium(II) dichloride ( $\text{PdCl}_2$ , 6.10 mg, 35.0  $\mu\text{mol}$ ) was added slowly to the solution of **3** (30.0 mg, 17.0  $\mu\text{mol}$ ) in DCM/MeOH (24/6 mL) with sodium acetate ( $\text{NaOAc}$ , 2.80 mg, 35.0  $\mu\text{mol}$ ), and the mixture was stirred for 10 h. The reaction mixture was passed through a basic alumina column to remove insoluble solids. After the solvent was removed in vacuo, the raw products were purified on silica gel columns using PE/DCM = 1.5/1(v/v) as the eluent. Finally, **4-Cl** was obtained as a green solid (11.0 mg, 37%).

**4-Cl:**  $^1\text{H}$  NMR (400 MHz,  $\text{CDCl}_3$ )  $\delta$  10.66 (d,  $J = 2.8$  Hz, 1H), 10.15 (s, 1H), 9.78 (s, 1H), 9.42 (s, 1H), 9.34 (s, 1H), 9.16 (s, 3H), 9.10 (s, 1H), 6.25 (s, 3H, Ph-H), 5.76 (s, 6H, Ph-H), 4.22 (s, 6H, Ph-H), -4.08 (s, 1H). UV/Vis/NIR [ $(\text{CH}_2\text{Cl}_2)$ :  $\lambda_{\text{max}}$  (nm) ( $\epsilon \times 10^5 \text{ mol}^{-1}\text{dm}^3\text{cm}^{-1}$ ): 622 (3.52), 768 (0.30), 862 (0.28), 974 (0.52). HRMS:  $m/z$ ;  $[M]^+$ : calcd for  $\text{C}_{77}\text{H}_{25}\text{ClF}_{25}\text{N}_4\text{OPd}_2\text{S}_2$ : 1837.8588; Found: 1837.8573.

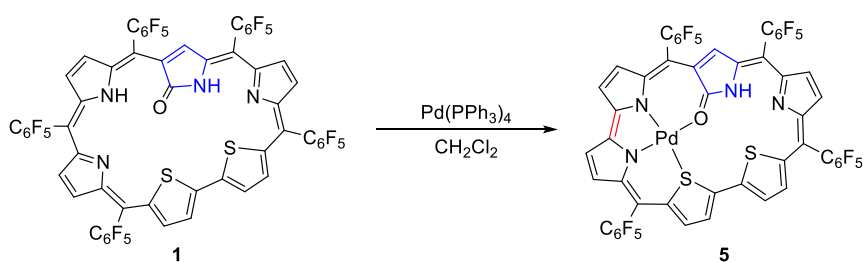

**5:** Tetrakis(triphenylphosphine) palladium(0) ( $\text{Pd}(\text{PPh}_3)_4$ , 260 mg, 0.225 mmol) was added slowly to the solution of **1** (150 mg, 0.113 mmol) in DCM (150 mL), and the mixture was stirred for 24 h. The reaction mixture was passed through a basic alumina column to remove insoluble solids. After the solvent was removed in vacuo, the raw products were purified on silica gel columns using PE/DCM = 2/1(v/v) as the eluent. Finally, **5** was obtained as a violet solid (21.0 mg, 15%).

---

**5**:  $^1\text{H}$  NMR (400 MHz,  $\text{CDCl}_3$ )  $\delta$  12.13 (dd,  $J = 10.6, 4.9$  Hz, 2H), 11.19 (s, 1H), 10.91 (d,  $J = 4.7$  Hz, 1H), 10.78 (dd,  $J = 8.6, 4.7$  Hz, 2H), 10.66 (d,  $J = 2.8$  Hz, 1H), 9.94 (d,  $J = 4.4$  Hz, 1H), 9.87 (d,  $J = 3.8$  Hz, 1H), 9.62 (d,  $J = 4.3$  Hz, 1H), 9.57 (d,  $J = 4.4$  Hz, 1H), -2.10 (s, 1H, NH).  $\delta$  11.46 (d,  $J = 5.1$  Hz, 1H), 11.38 (d,  $J = 5.4$  Hz, 1H), 10.45 (s, 1H), 10.38 (d,  $J = 4.9$  Hz, 1H), 10.00 (d,  $J = 5.3$  Hz, 1H), 9.75 (d,  $J = 4.8$  Hz, 1H), 9.57 (d,  $J = 4.4$  Hz, 1H), 9.45 (d,  $J = 4.7$  Hz, 1H), 9.28 (d,  $J = 4.2$  Hz, 1H), 9.16 (d,  $J = 4.2$  Hz, 1H), 8.90 (t,  $J = 12.6$  Hz, 1H), 1.11 (s, 1H, NH).  $^{13}\text{C}$  NMR (151 MHz,  $\text{CDCl}_3$ )  $\delta$  158.0, 154.3, 149.9, 148.3, 148.2, 146.4 (d,  $^1J_{CF} = 255$  Hz\*), 142.6, 142.3 (d,  $^1J_{CF} = 253$  Hz\*), 138.8, 138.1 (d,  $^1J_{CF} = 252$  Hz\*), 137.4, 136.6, 136.1, 136.1, 135.2, 135.1, 133.8, 132.9, 132.6, 132.5, 131.9, 131.2, 131.1, 130.1, 129.9, 129.8, 129.7, 126.2, 125.5, 125.3, 125.2, 124.8, 123.9, 122.1, 121.3, 120.5, 119.9, 118.9, 116.5, 113.7, 112.9, 108.2, 106.2, 104.0. UV/Vis/NIR [( $\text{CH}_2\text{Cl}_2$ ):  $\lambda_{\text{max}}$  (nm) ( $\epsilon \times 10^5$  mol $^{-1}$ dm $^3$ cm $^{-1}$ ): 568 (1.22), 602 (1.24), 840 (0.27). HRMS:  $m/z$ ;  $[M]^+$ : calcd for  $\text{C}_{52}\text{H}_{12}\text{F}_{20}\text{N}_4\text{OPdS}_2$  : 1257.9179; Found: 1257.9174.



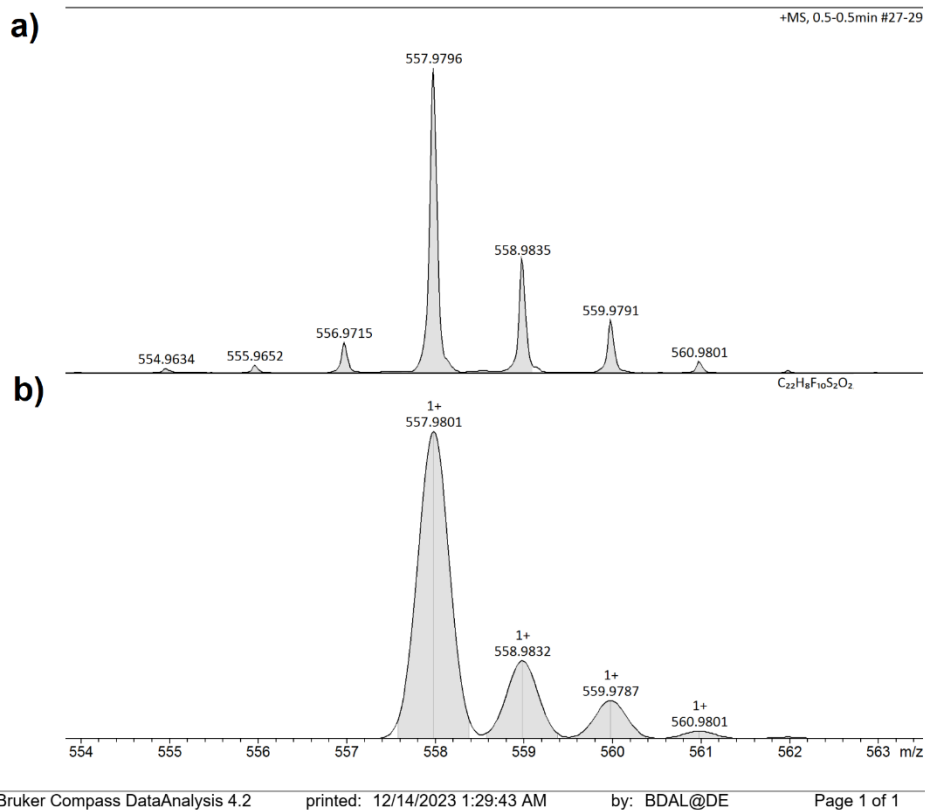

**Figure S1.** a) Experimental HR-ESI-MS and b) simulated HRMS of **a**.

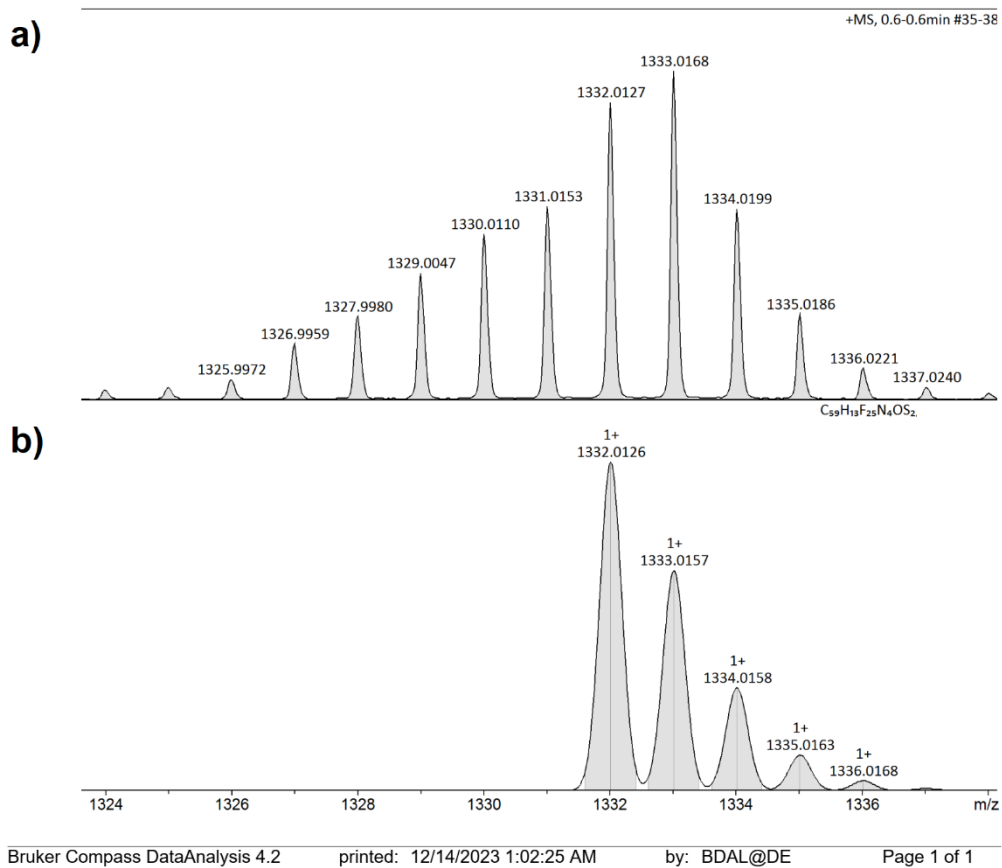

**Figure S2.** a) Experimental HR-ESI-MS and b) simulated HRMS of **1**.

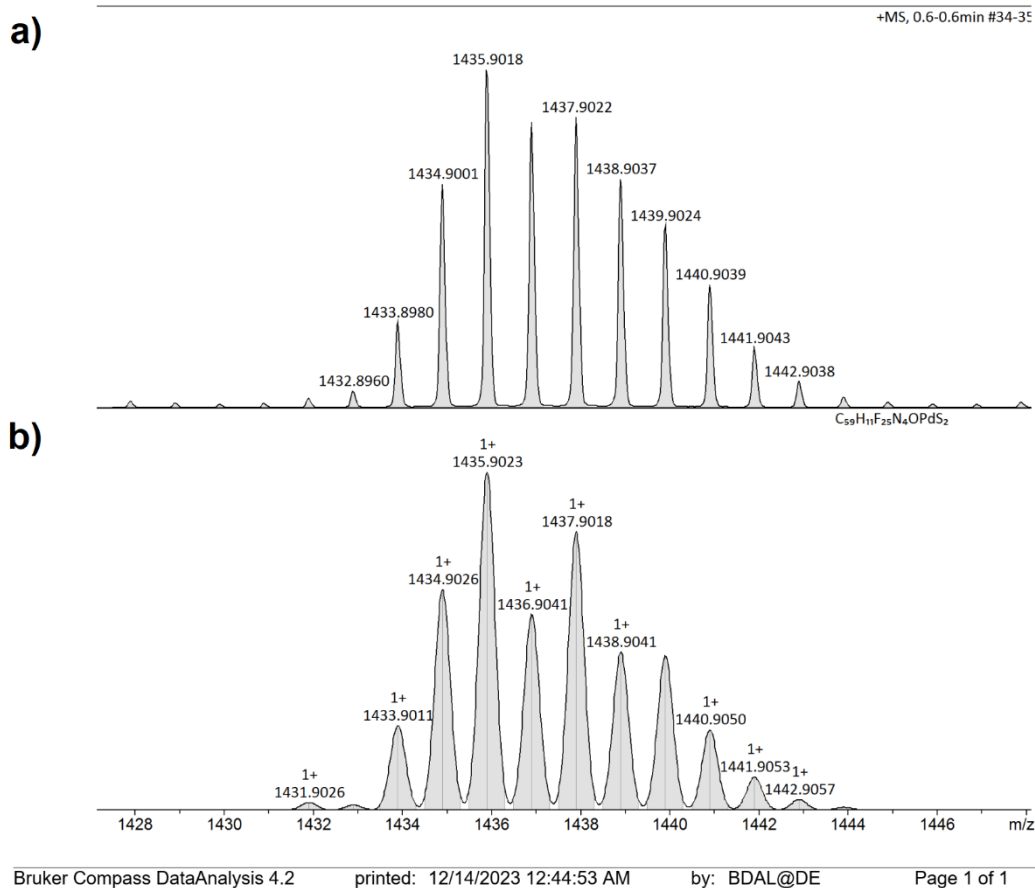

**Figure S3.** a) Experimental HR-ESI-MS and b) simulated HRMS of **2**.

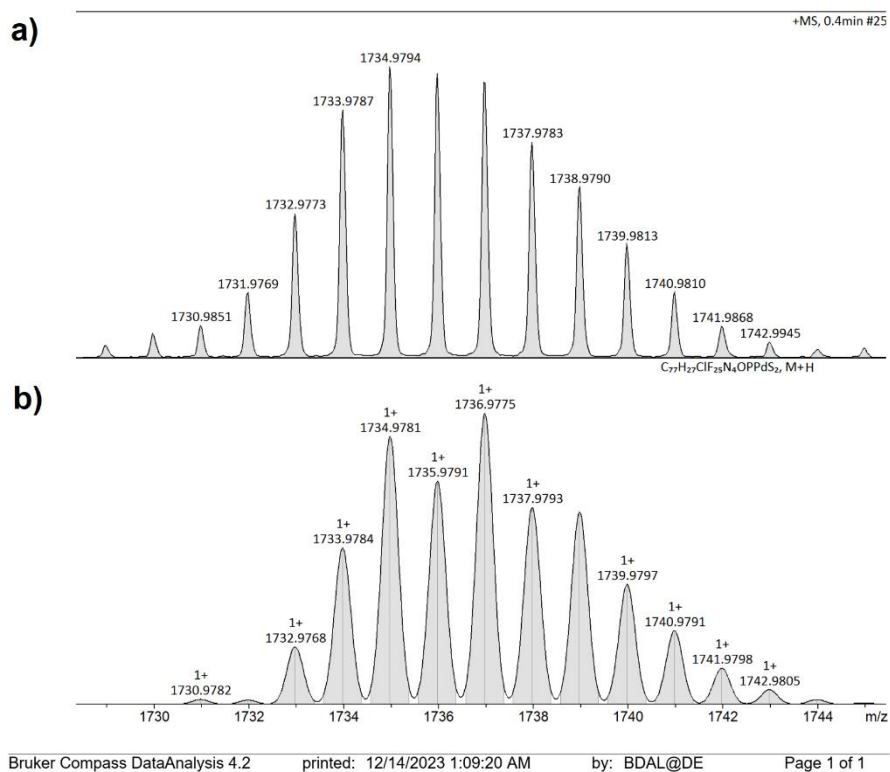

**Figure S4.** a) Experimental HR-ESI-MS and b) simulated HRMS of **3**.

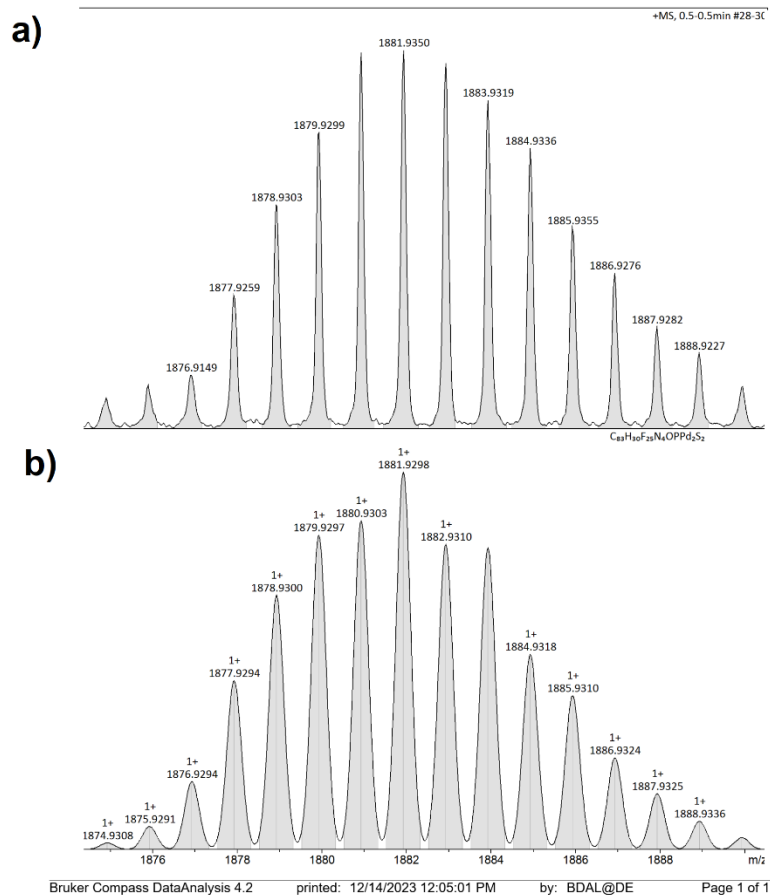

Figure S5. a) Experimental HR-ESI-MS and b) simulated HRMS of **4-Ph**.

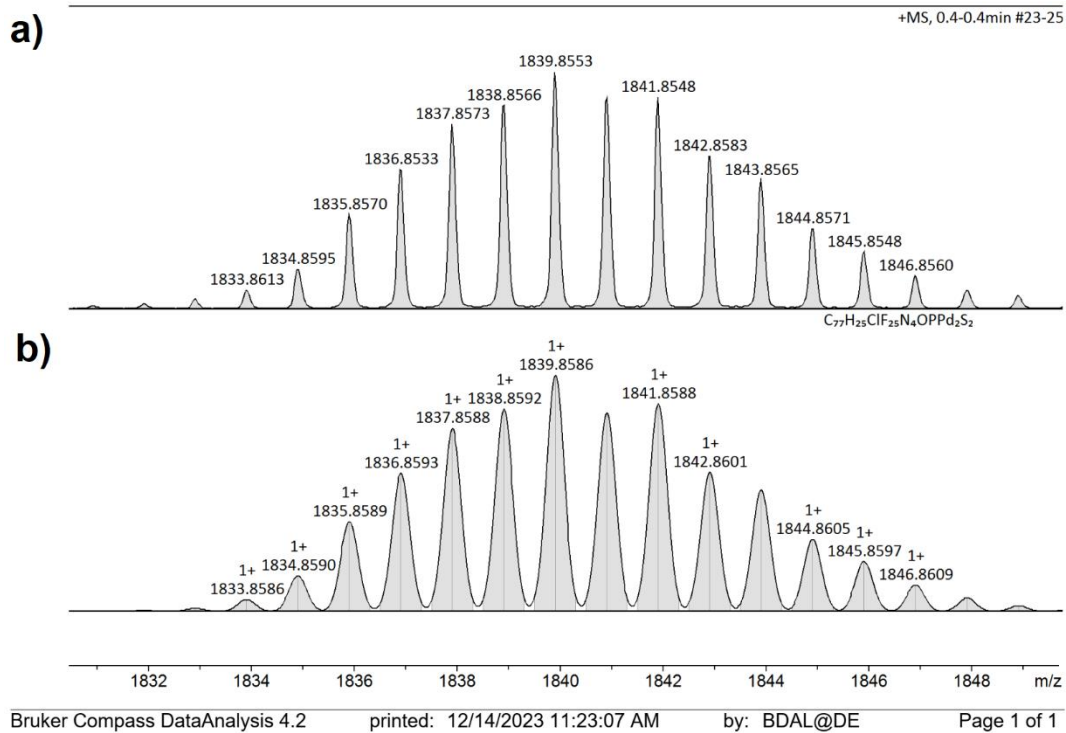

Figure S6. a) Experimental HR-ESI-MS and b) simulated HRMS of **4-Cl**.

a)

+MS, 0.6-0.7min #37-35

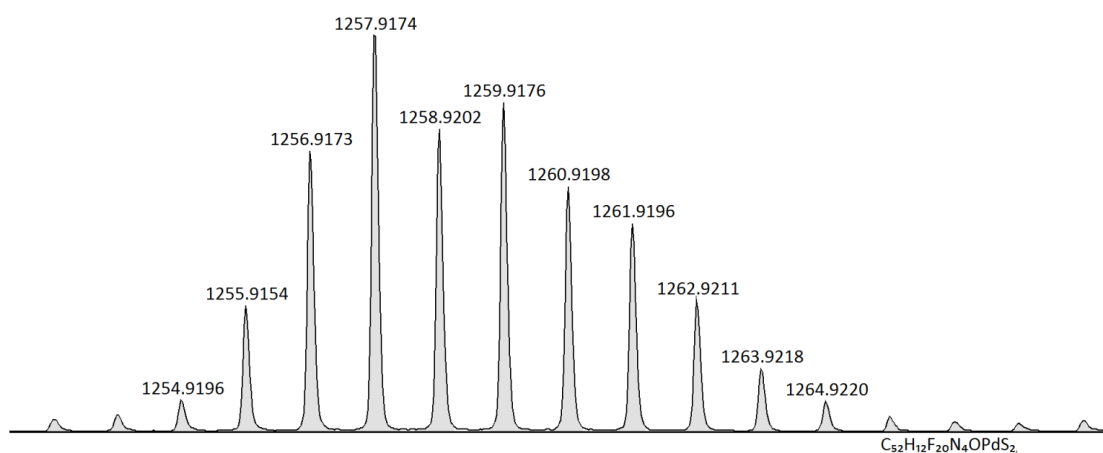

b)

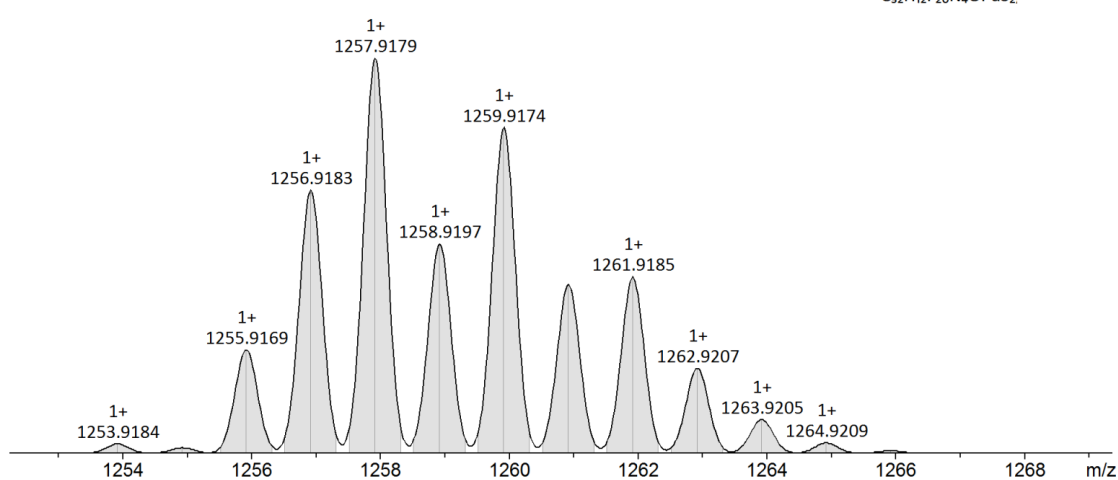

Bruker Compass DataAnalysis 4.2

printed: 12/14/2023 12:59:13 AM

by: BDAL@DE

Page 1 of 1

**Figure S7.** a) Experimental HR-ESI-MS and b) simulated HRMS of **5**.

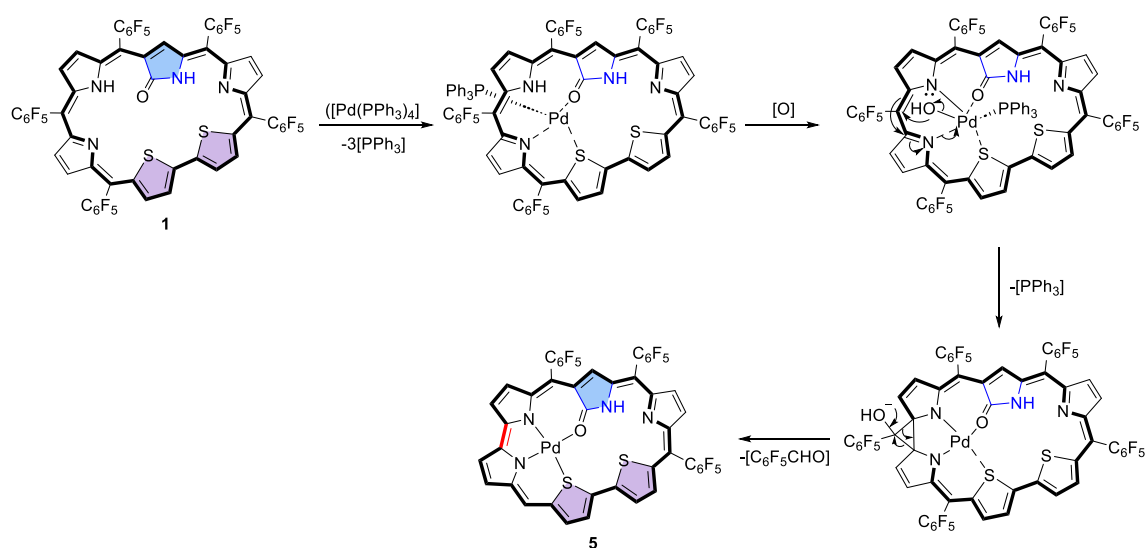

**Figure S8.** The plausible mechanism for generating **5** from **1**.

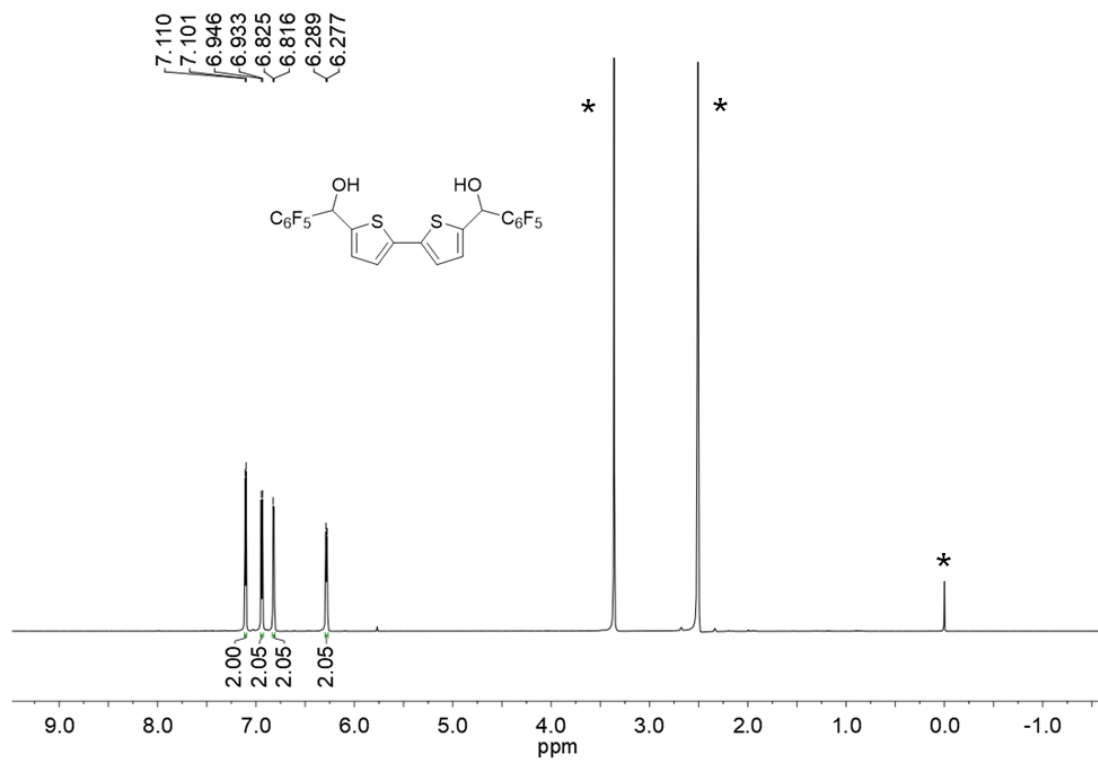

Figure S9. <sup>1</sup>H NMR (400 MHz) spectrum of **a** in DMSO-*d*<sub>6</sub>.

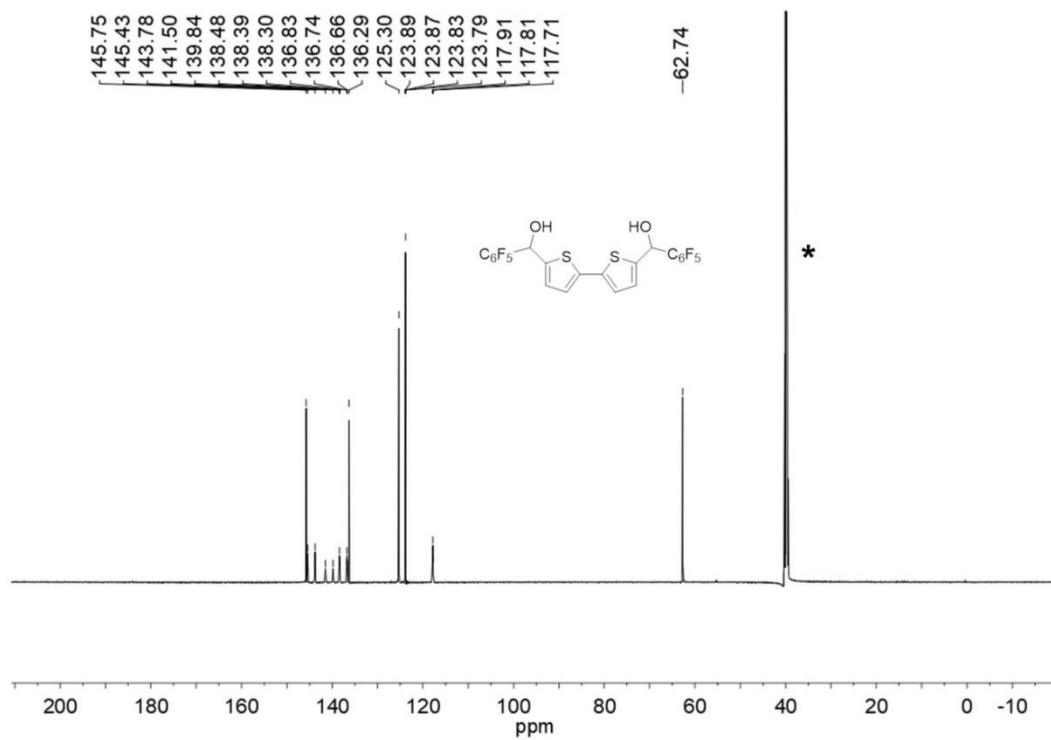

Figure S10. <sup>13</sup>C NMR (151 MHz) spectrum of **a** in DMSO-*d*<sub>6</sub>.

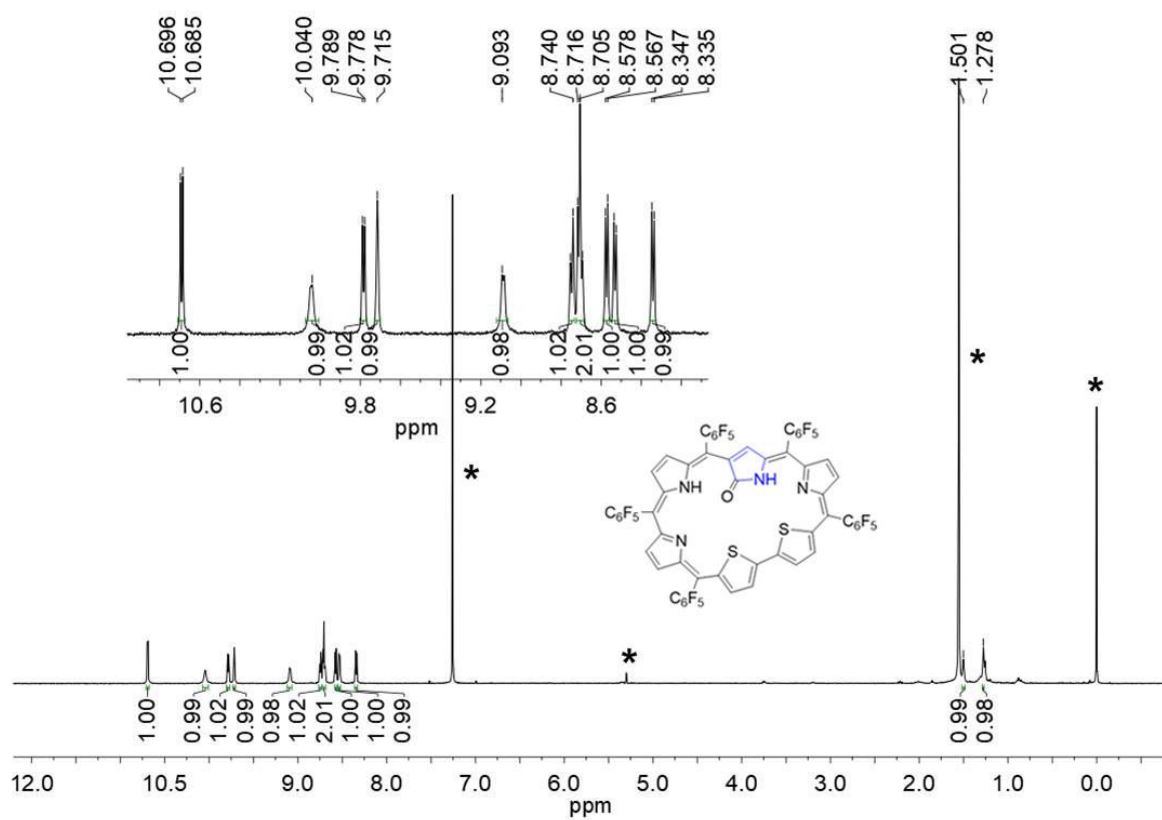

Figure S11. <sup>1</sup>H NMR (400 MHz) spectrum of **1** in CDCl<sub>3</sub>.

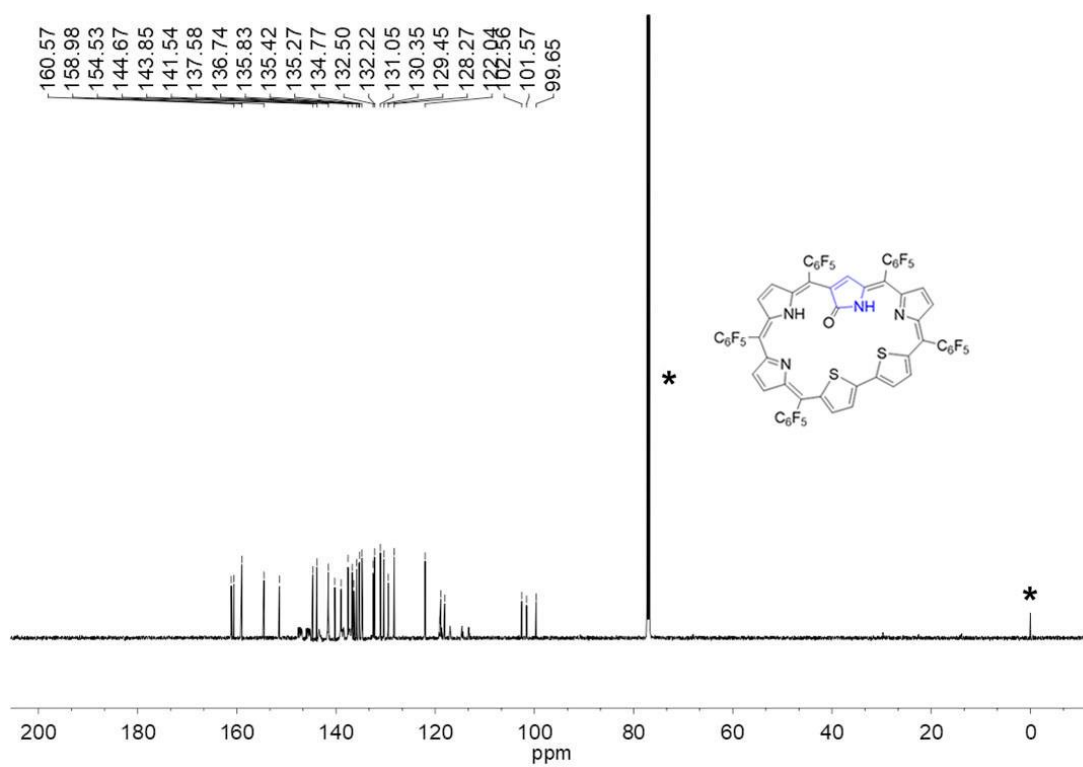

Figure S12. <sup>13</sup>C NMR (151 MHz) spectrum of **1** in CDCl<sub>3</sub>.

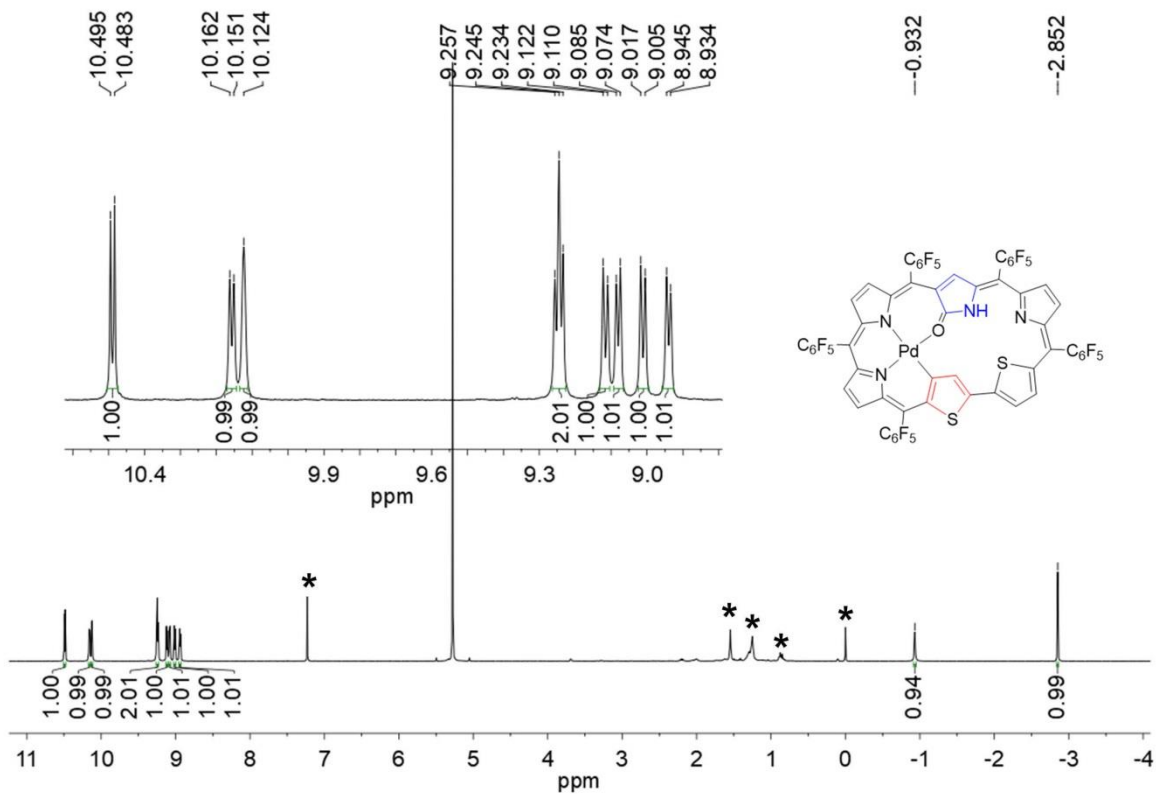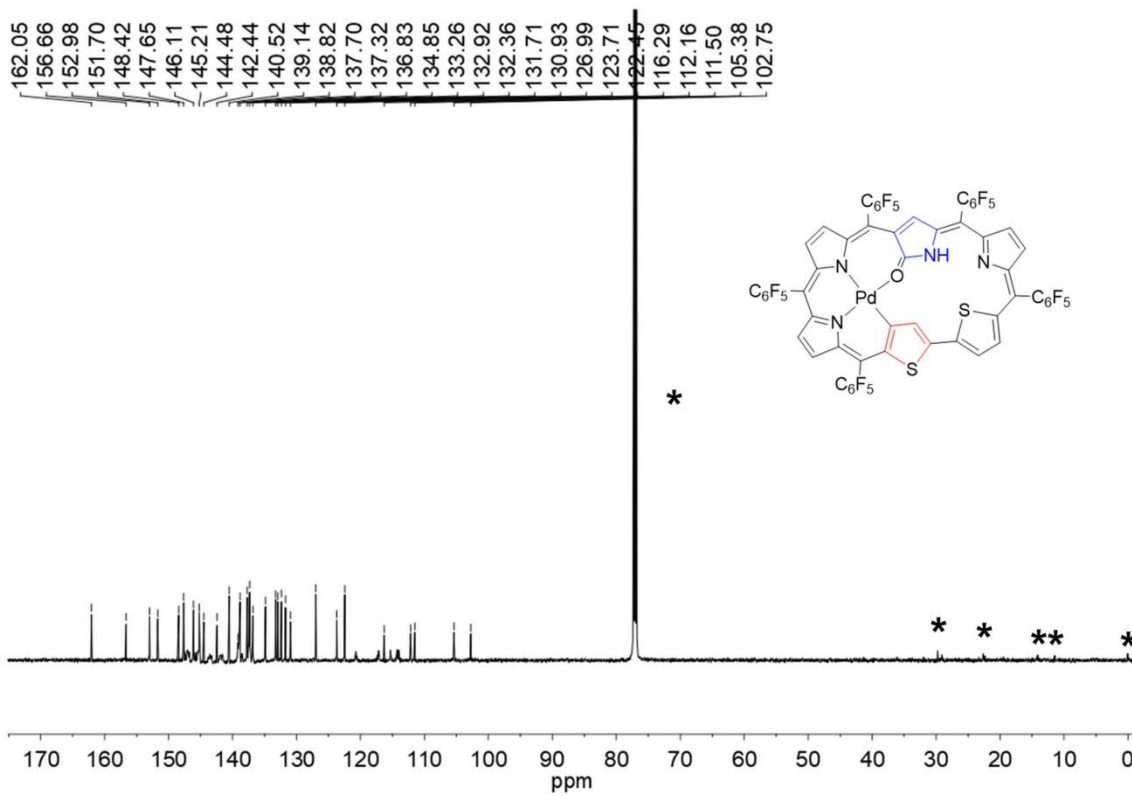

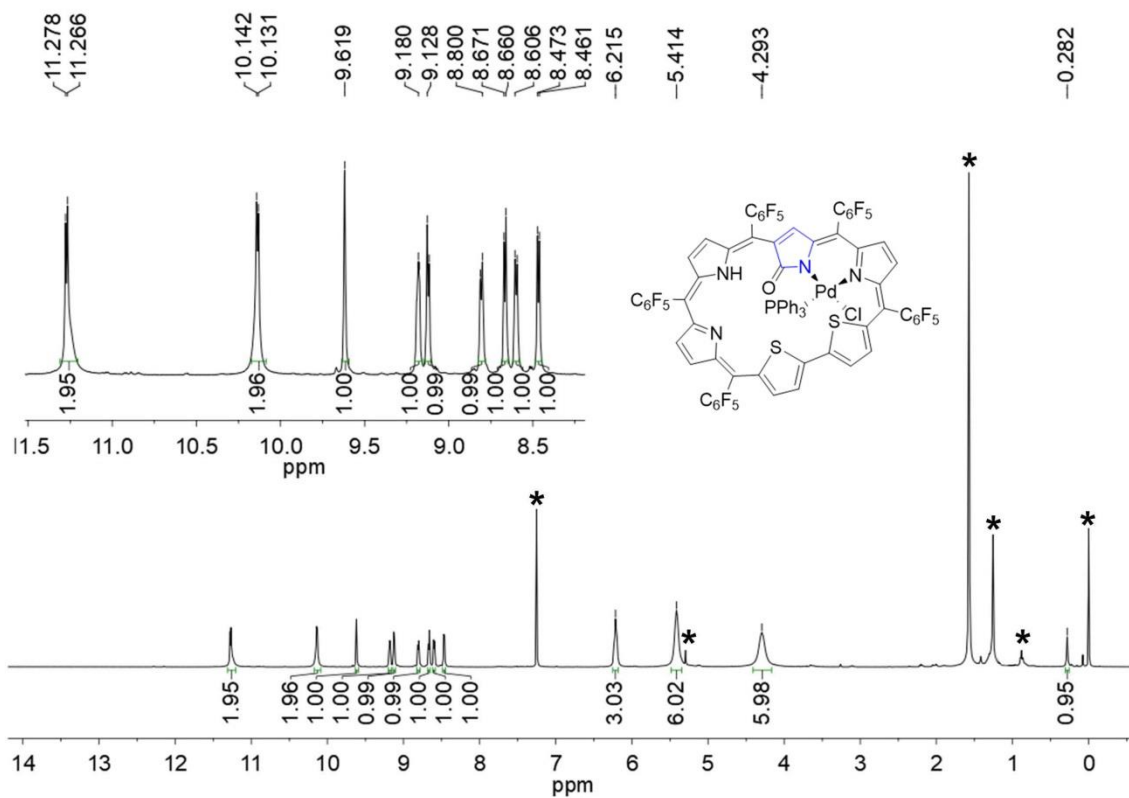

Figure S15. <sup>1</sup>H NMR (400 MHz) spectrum of **3** in CDCl<sub>3</sub>.

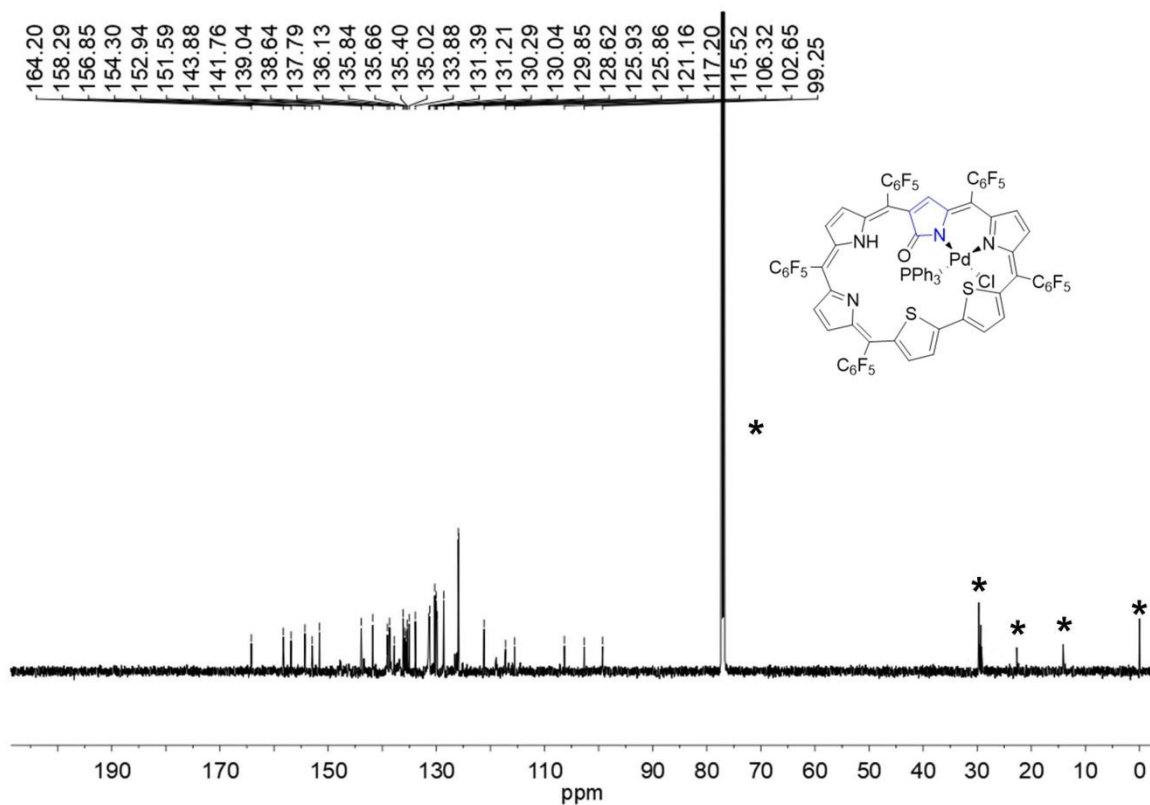

Figure S16. <sup>13</sup>C NMR (151 MHz) spectrum of **3** in CDCl<sub>3</sub>.



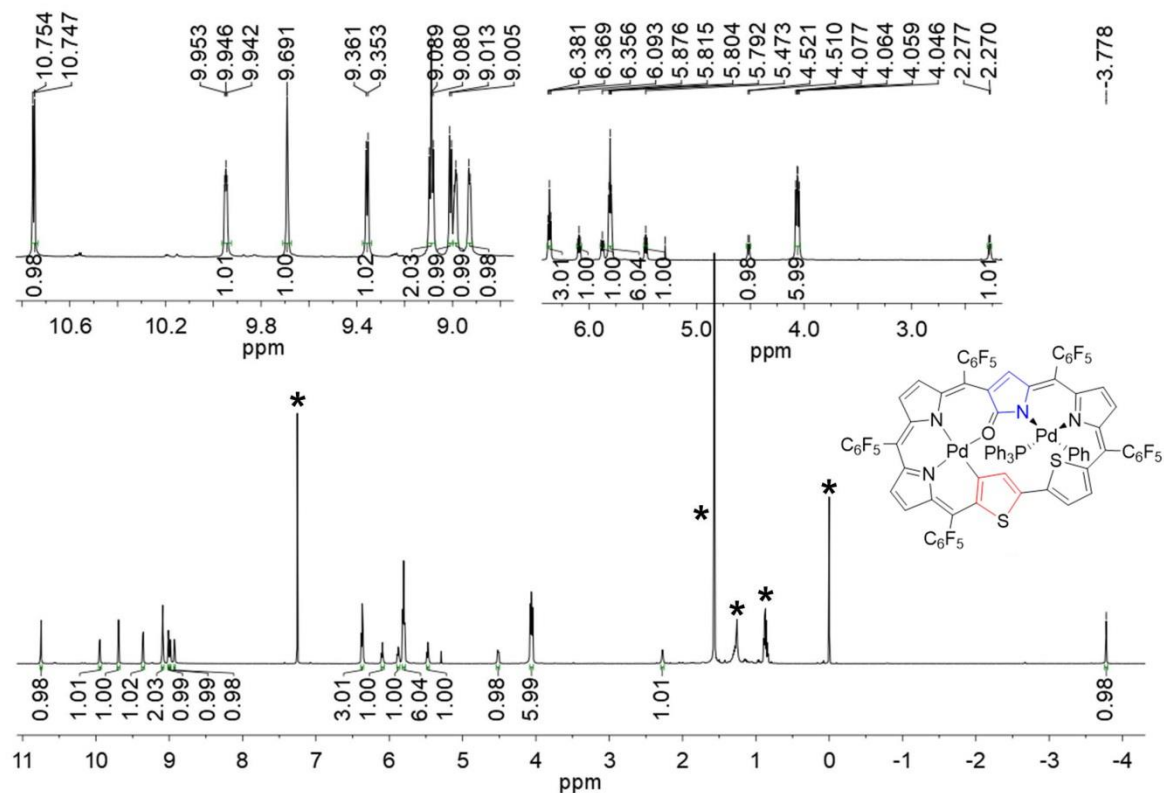

Figure S17.  $^1\text{H}$  NMR (600 MHz) spectrum of **4-Ph** in  $\text{CDCl}_3$ .

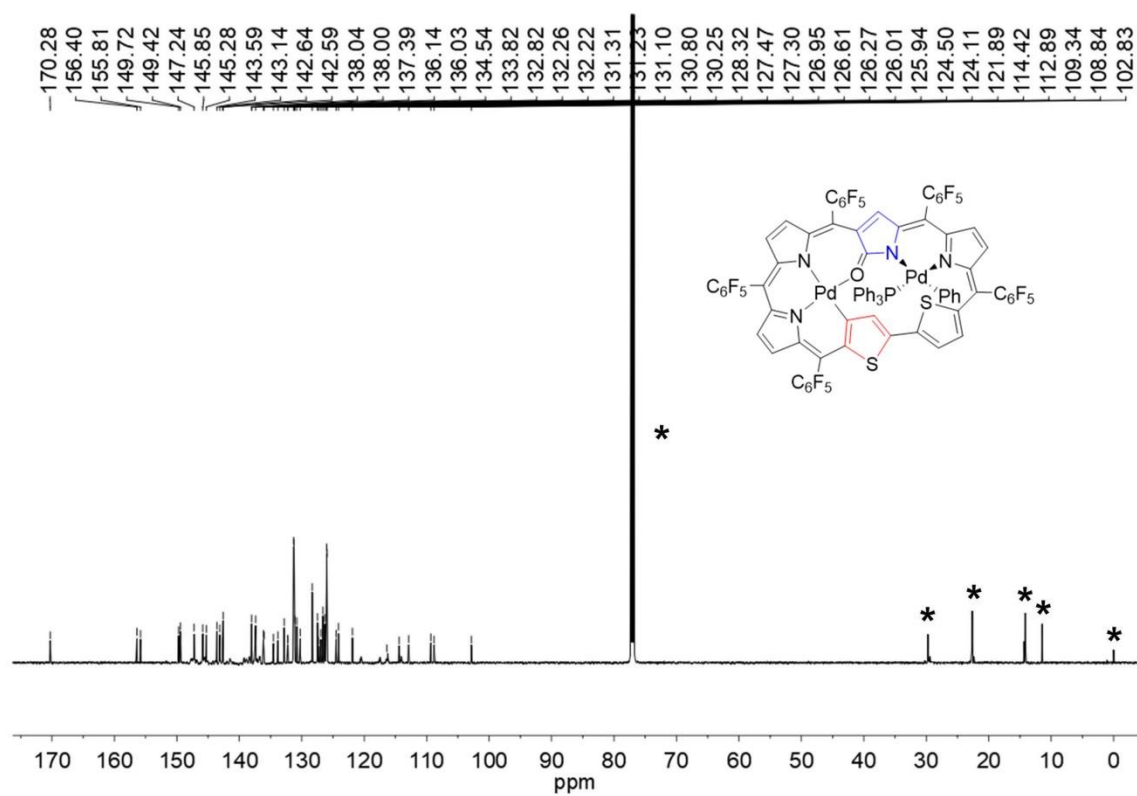

Figure S18.  $^{13}\text{C}$  NMR (151 MHz) spectrum of **4-Ph** in  $\text{CDCl}_3$ .

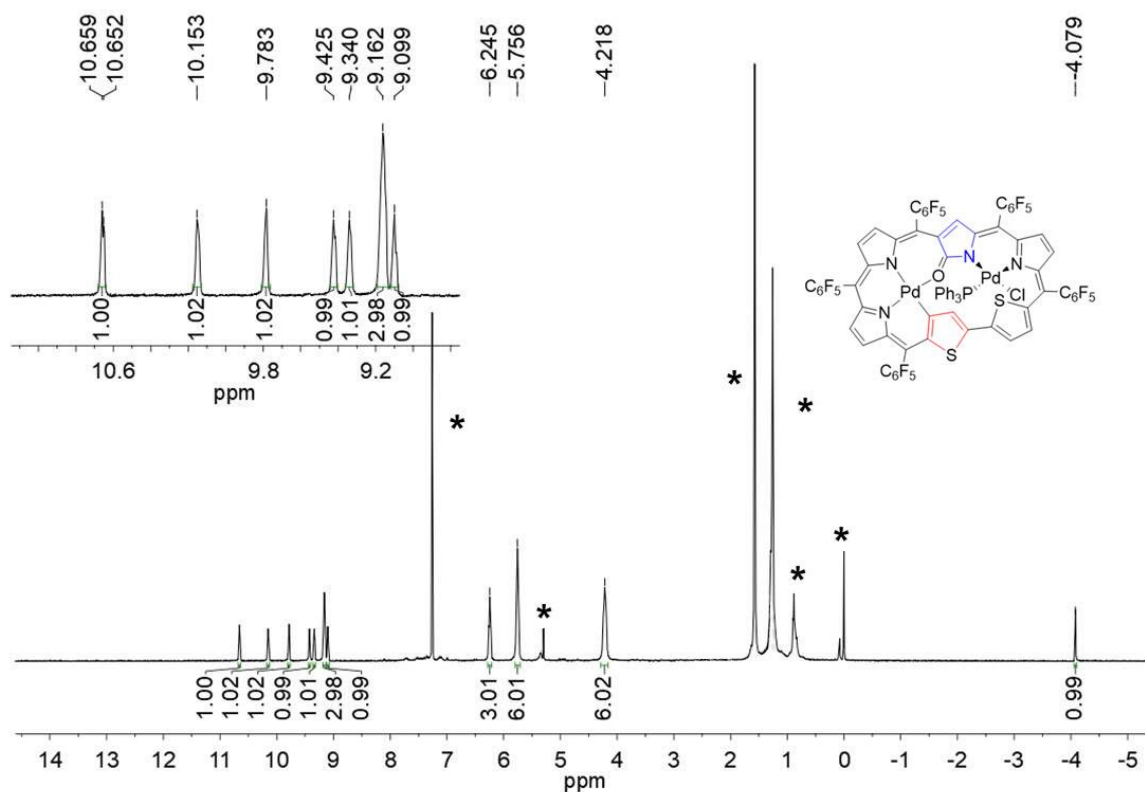

Figure S19. <sup>1</sup>H NMR (400 MHz) spectrum of 4-Cl in CDCl<sub>3</sub>.

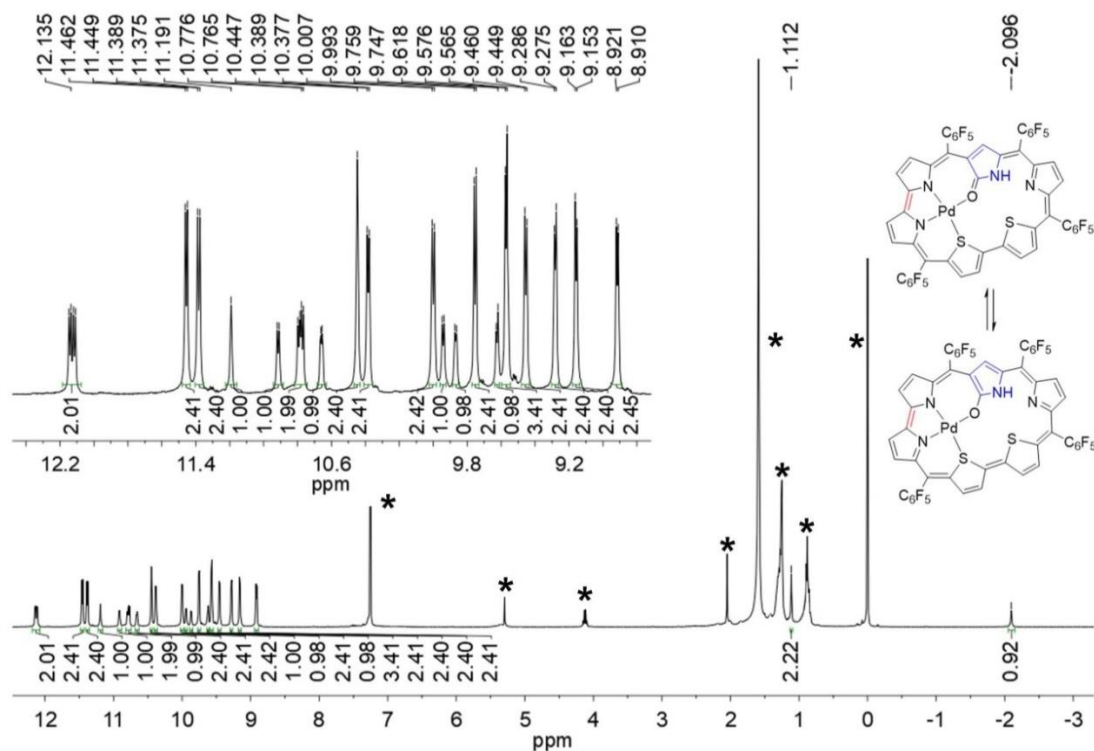

Figure S20. <sup>1</sup>H NMR (400 MHz) spectrum of 5 in CDCl<sub>3</sub>. Two sets of peaks are observed with the molar ratio of 1:2.4, indicating the coexistence of two isomers.

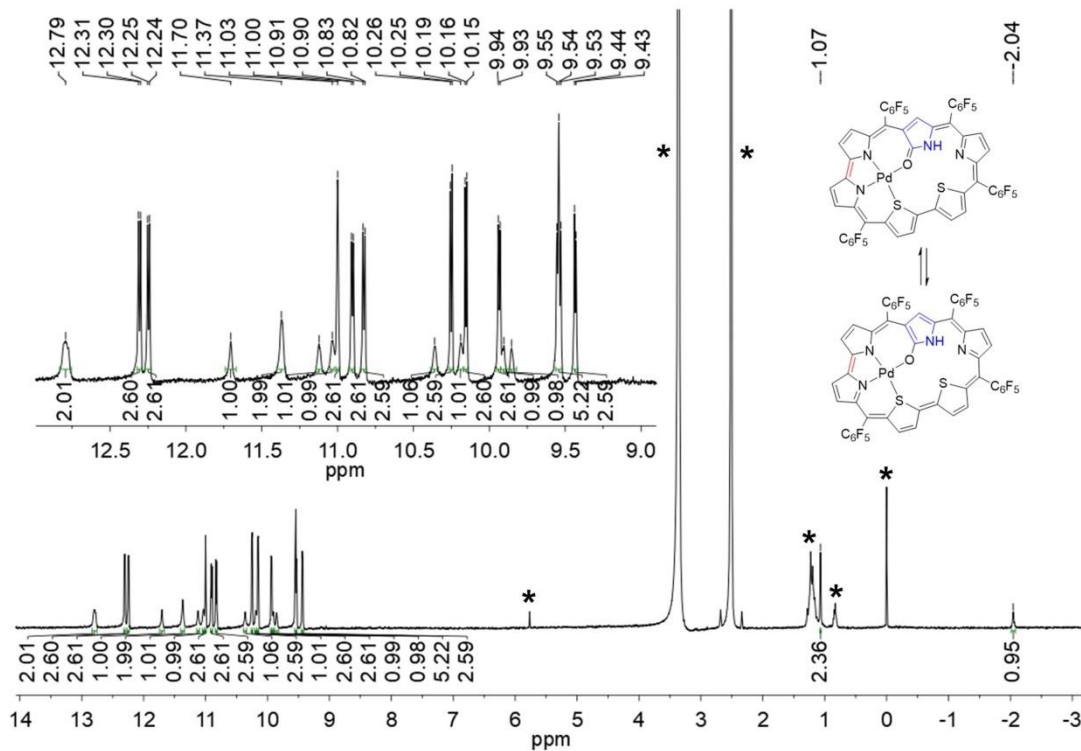

**Figure S21.**  $^1\text{H}$  NMR (400 MHz) spectrum of **5** in  $\text{DMSO-}d_6$ . Two sets of peaks are observed with the molar ratio of 1:2.6, indicating the coexistence of two isomers.

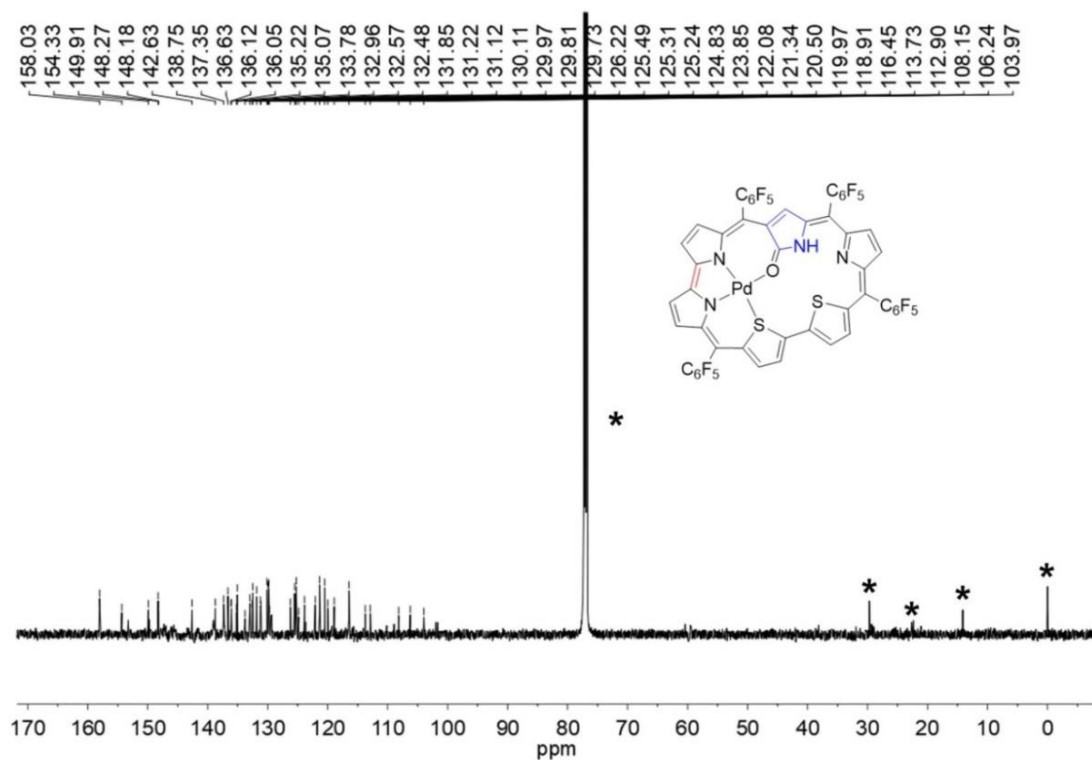

**Figure S22.**  $^{13}\text{C}$  NMR (151 MHz) spectrum of **5** in  $\text{CDCl}_3$ .

**Table S1.** Crystal data and structure refinements of **1**, **2**, **3**, **4-Ph** and **5**.

| Compounds                                          | <b>1</b>                                                                           | <b>2</b>                                                                             | <b>3</b>                                                                                | <b>4-Ph</b>                                                                                        | <b>5</b>                                                                             |
|----------------------------------------------------|------------------------------------------------------------------------------------|--------------------------------------------------------------------------------------|-----------------------------------------------------------------------------------------|----------------------------------------------------------------------------------------------------|--------------------------------------------------------------------------------------|
| Formula                                            | C <sub>59</sub> H <sub>13</sub> F <sub>25</sub> N <sub>4</sub> O<br>S <sub>2</sub> | C <sub>59</sub> H <sub>11</sub> F <sub>25</sub> N <sub>4</sub> OPd<br>S <sub>2</sub> | C <sub>77</sub> H <sub>27</sub> ClF <sub>25</sub> N <sub>4</sub> O<br>PPdS <sub>2</sub> | C <sub>87</sub> H <sub>36</sub> F <sub>25</sub> N <sub>6</sub> OPPd<br><sub>2</sub> S <sub>2</sub> | C <sub>52</sub> H <sub>12</sub> F <sub>20</sub> N <sub>4</sub> OP<br>dS <sub>2</sub> |
| Formula weight (g/mol)                             | 1332.85                                                                            | 1437.24                                                                              | 1735.96                                                                                 | 1964.11                                                                                            | 1259.18                                                                              |
| Crystal system                                     | triclinic                                                                          | triclinic                                                                            | triclinic                                                                               | triclinic                                                                                          | triclinic                                                                            |
| Temperature (K)                                    | 213(2)                                                                             | 213(2)                                                                               | 213(2)                                                                                  | 213(2)                                                                                             | 213(2)                                                                               |
| Crystal size (mm <sup>3</sup> )                    | 0.18 × 0.14 × 0.07                                                                 | 0.12 × 0.1 × 0.06                                                                    | 0.16 × 0.13 × 0.11                                                                      | 0.19 × 0.16 × 0.12                                                                                 | 0.19 × 0.16 × 0.12                                                                   |
| Theta range for data collection (°)                | 2.10 to 25.00                                                                      | 1.86 to 25.00                                                                        | 2.49 to 27.52                                                                           | 1.89 to 26.00                                                                                      | 2.05 to 26.00                                                                        |
| Space group                                        | <i>P-1</i>                                                                         | <i>P-1</i>                                                                           | <i>P-1</i>                                                                              | <i>P-1</i>                                                                                         | <i>P-1</i>                                                                           |
| <i>a</i> (Å)                                       | 9.774(10)                                                                          | 12.633(2)                                                                            | 16.915(6)                                                                               | 14.976(2)                                                                                          | 17.633(3)                                                                            |
| <i>b</i> (Å)                                       | 14.769(14)                                                                         | 16.870(3)                                                                            | 17.3251(16)                                                                             | 16.782(2)                                                                                          | 18.145(3)                                                                            |
| <i>c</i> (Å)                                       | 18.881(19)                                                                         | 18.510(3)                                                                            | 19.0029(17)                                                                             | 16.991(2)                                                                                          | 19.027(3)                                                                            |
| <i>α</i> (°)                                       | 95.08(3)                                                                           | 113.418(4)                                                                           | 70.416(9)                                                                               | 106.814(4)                                                                                         | 104.695(4)                                                                           |
| <i>β</i> (°)                                       | 95.96(4)                                                                           | 96.893(4)                                                                            | 65.162(8)                                                                               | 90.699(5)                                                                                          | 103.672(5)                                                                           |
| <i>γ</i> (°)                                       | 92.17(3)                                                                           | 108.505(4)                                                                           | 76.985(9)                                                                               | 107.905(4)                                                                                         | 112.112(4)                                                                           |
| Volume (Å <sup>3</sup> )                           | 2697(5)                                                                            | 3292.4(10)                                                                           | 4738.3(7)                                                                               | 3866.0(9)                                                                                          | 5067.6(14)                                                                           |
| <i>Z</i>                                           | 2                                                                                  | 2                                                                                    | 2                                                                                       | 2                                                                                                  | 4                                                                                    |
| $\rho_{\text{calc}}$ (g/cm <sup>3</sup> )          | 1.641                                                                              | 1.450                                                                                | 1.217                                                                                   | 1.687                                                                                              | 1.650                                                                                |
| <i>F</i> (000)                                     | 1320                                                                               | 1408                                                                                 | 1720                                                                                    | 1944                                                                                               | 2472                                                                                 |
| $\mu$ (mm <sup>-1</sup> )                          | 0.233                                                                              | 0.456                                                                                | 0.372                                                                                   | 0.655                                                                                              | 0.566                                                                                |
| Index ranges                                       | -11 ≤ <i>h</i> ≤ 11,<br>-17 ≤ <i>k</i> ≤ 17,<br>-22 ≤ <i>l</i> ≤ 22                | -15 ≤ <i>h</i> ≤ 15,<br>-20 ≤ <i>k</i> ≤ 20,<br>-22 ≤ <i>l</i> ≤ 21                  | -21 ≤ <i>h</i> ≤ 21,<br>-22 ≤ <i>k</i> ≤ 22,<br>-24 ≤ <i>l</i> ≤ 24                     | 0 ≤ <i>h</i> ≤ 19,<br>21 ≤ <i>k</i> ≤ 21,<br>-22 ≤ <i>l</i> ≤ 22                                   | -21 ≤ <i>h</i> ≤ 21,<br>-22 ≤ <i>k</i> ≤ 22,<br>-23 ≤ <i>l</i> ≤ 23                  |
| <i>R</i> <sub>1</sub> [ <i>I</i> > 2σ( <i>I</i> )] | 0.1215                                                                             | 0.0708                                                                               | 0.0471                                                                                  | 0.0650                                                                                             | 0.0685                                                                               |
| <i>wR</i> <sub>2</sub> (all data)                  | 0.3407                                                                             | 0.2058                                                                               | 0.1539                                                                                  | 0.1725                                                                                             | 0.2321                                                                               |
| GOF                                                | 1.086                                                                              | 0.977                                                                                | 1.028                                                                                   | 1.043                                                                                              | 1.031                                                                                |
| CCDC number                                        | 2277039                                                                            | 2277040                                                                              | 2277041                                                                                 | 2277042                                                                                            | 2277043                                                                              |

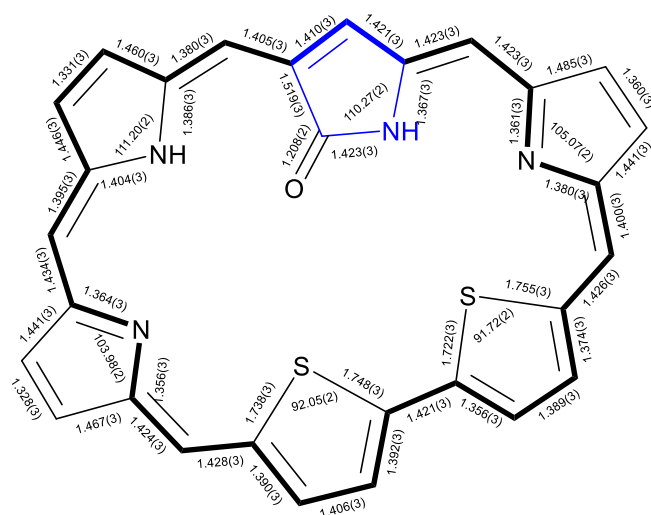

**Figure S23.** Selected bond lengths (Å) in the crystal structure of **1** (the HOMA value was calculated to be 0.60).

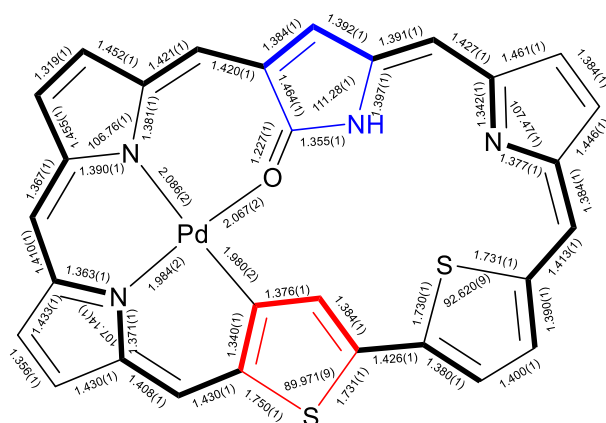

**Figure S24.** Selected bond lengths (Å) in the crystal structure of **2** (the HOMA value was calculated to be 0.62).

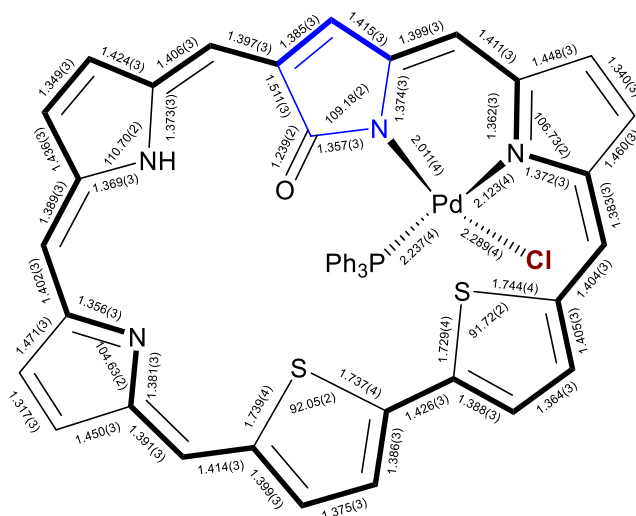

**Figure S25.** Selected bond lengths (Å) in the crystal structure of **3** (the HOMA value was calculated to be 0.77).

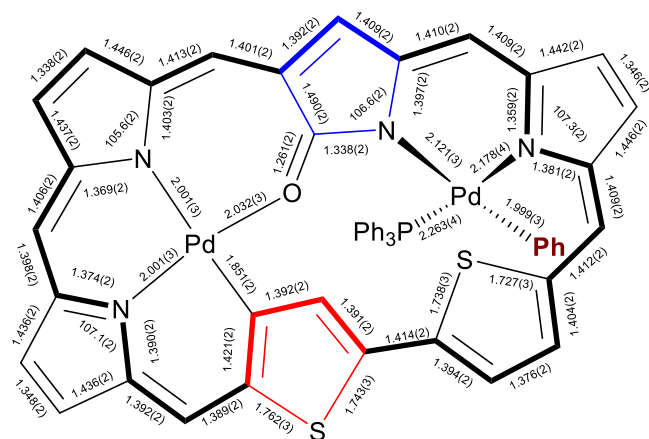

**Figure S26.** Selected bond lengths (Å) in the crystal structure of **4-Ph** (the HOMA value was calculated to be 0.65).

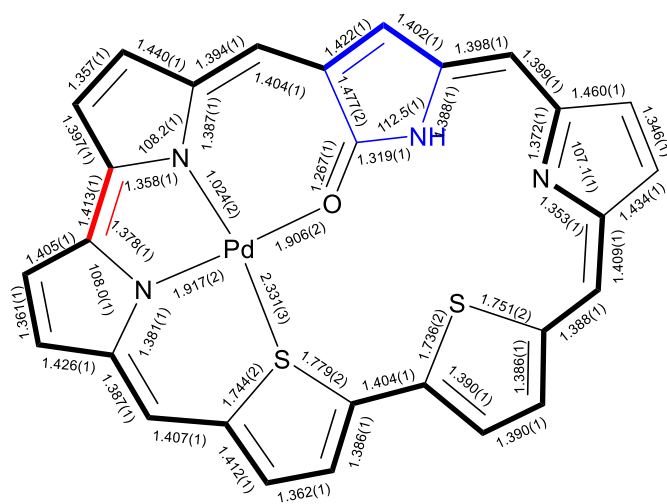

**Figure S27.** Selected bond lengths (Å) in the crystal structure of **5** (the HOMA value was calculated to be 0.84).

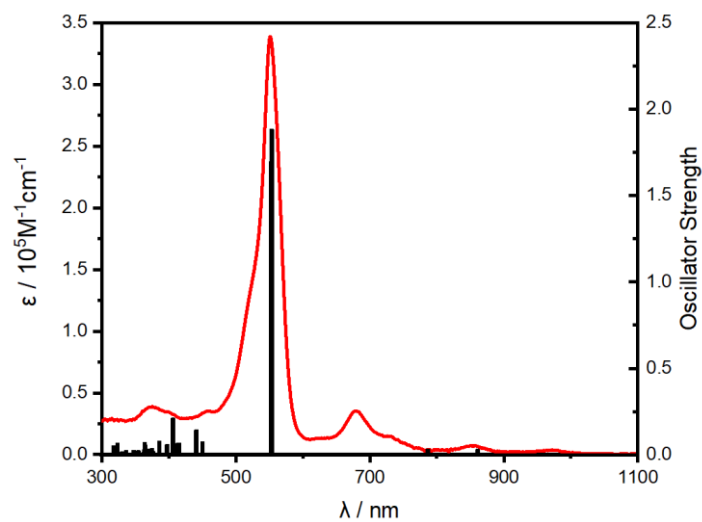

**Figure S28.** TD-DFT-computed vertical energies of **1** along with the experimental spectrum.

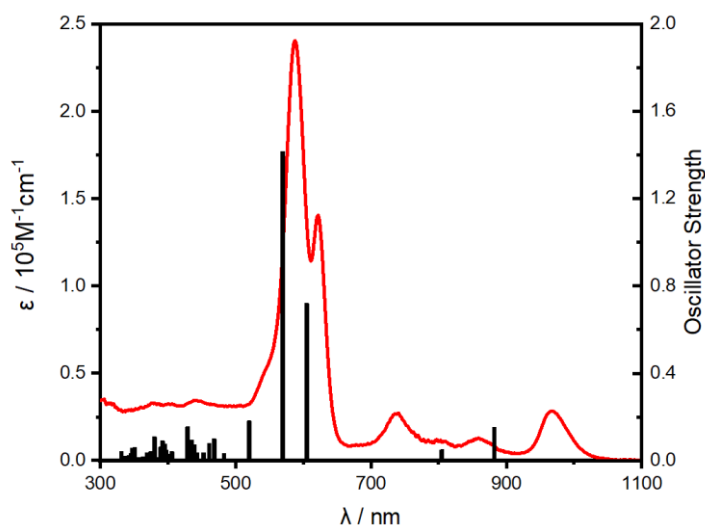

**Figure S29.** TD-DFT-computed vertical energies of **2** along with the experimental spectrum.

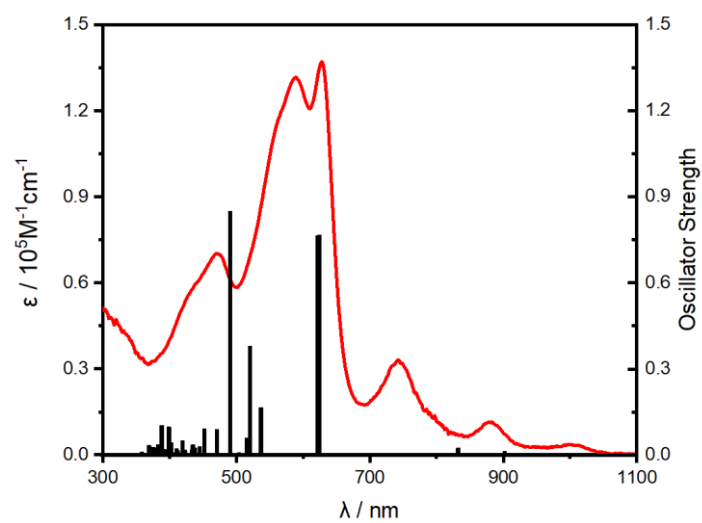

**Figure S30.** TD-DFT-computed vertical energies of **3** along with the experimental spectrum.

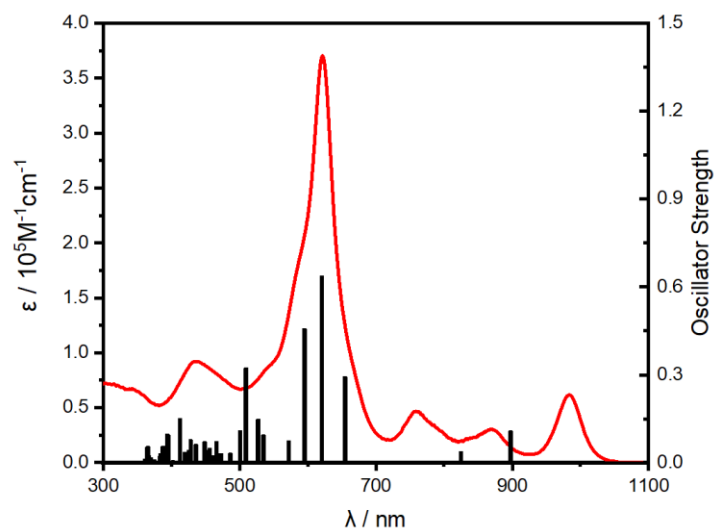

**Figure S31.** TD-DFT-computed vertical energies of **4-Ph** along with the experimental spectrum.

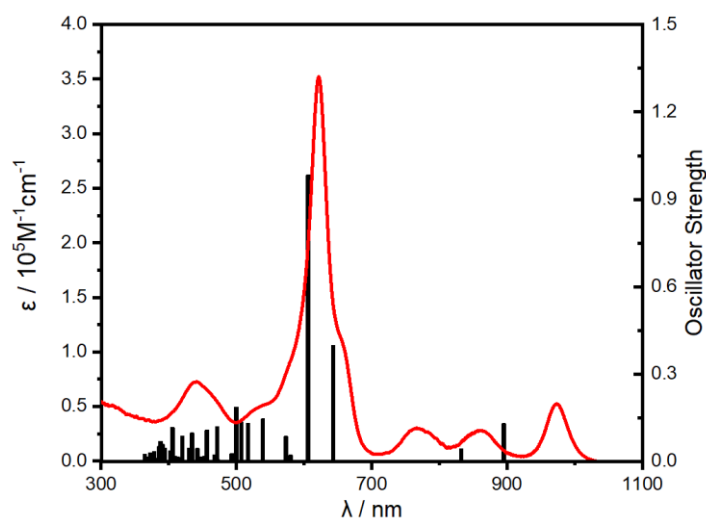

**Figure S32.** TD-DFT-computed vertical energies of **4-Cl** along with the experimental spectrum.

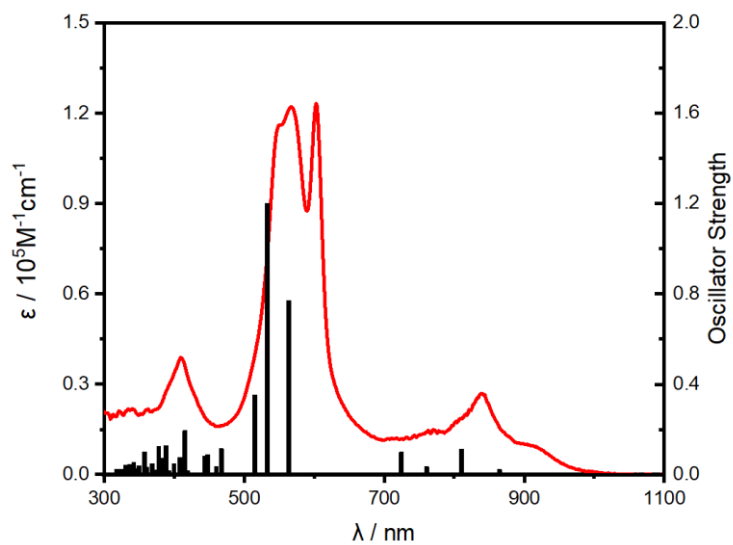

**Figure S33.** TD-DFT-computed vertical energies of **5** along with the experimental spectrum.



**Table S2.** Selected computed excitation energies, oscillator strengths and molecular orbital compositions for low-lying excited states of **1**.

| Excited State | Wavelength | Oscillator strength | MO compositions            |
|---------------|------------|---------------------|----------------------------|
| S1            | 872.6      | 0.0005              | H→L+1 (62%), H-1→L (36%)   |
| S2            | 652.5      | 0.6137              | H-1→L+1(60%), H-2→L (21%)  |
| S3            | 612.1      | 0.8754              | H-1→L (51%), H→L+1(34%)    |
| S4            | 506.1      | 0.6844              | H-2→L (56%), H-3→L (11%)   |
| S5            | 494.6      | 0.4432              | H-2→L+1(53%), H-3→L+1(30%) |
| S6            | 489.1      | 0.2104              | H-3→L (76%), H-2→L (9%)    |
| S7            | 482.5      | 0.1869              | H-3→L+1(63%), H-2→L+1(18%) |
| S8            | 463.1      | 0.4612              | H→L+2(77%), H-2→L (6%)     |
| S9            | 435.8      | 0.3107              | H-4→L (81%), H-4→L+1(9%)   |
| S10           | 426.8      | 0.3765              | H-1→L+2(43%), H-4→L+1(29%) |

**Table S3.** Selected computed excitation energies, oscillator strengths and molecular orbital compositions for low-lying excited states of **2**.

| Excited State | Wavelength | Oscillator strength | MO compositions           |
|---------------|------------|---------------------|---------------------------|
| S1            | 883.1      | 0.1515              | H→L (67%), H-1→L+1 (18%)  |
| S2            | 805.6      | 0.0481              | H→L+1 (42%), H-1→L (42%)  |
| S3            | 605.9      | 0.7188              | H-1→L (46%), H→L+1(45%)   |
| S4            | 570.3      | 1.4149              | H-1→L+1(68%), H→L (18%)   |
| S5            | 521        | 0.1809              | H-2→L (87%)               |
| S6            | 483.7      | 0.0302              | H-4→L (47%), H-3→L (25%)  |
| S7            | 469.4      | 0.0990              | H-2→L+1(55%), H-3→L (26%) |
| S8            | 462.3      | 0.0772              | H-3→L (34%), H-5→L (17%)  |
| S9            | 453.7      | 0.0359              | H→L+2 (34%), H→L+3 (19%)  |
| S10           | 444        | 0.0349              | H-5→L (30%), H→L+3 (14%)  |

**Table S4.** Selected computed excitation energies, oscillator strengths and molecular orbital compositions for low-lying excited states of **3**.

| Excited State | Wavelength | Oscillator strength | MO compositions           |
|---------------|------------|---------------------|---------------------------|
| S1            | 902.7      | 0.0111              | H→L (36%), H→L+1(22%)     |
| S2            | 833.4      | 0.0239              | H→L+1(29%), H-1→L (26%)   |
| S3            | 625.6      | 0.7662              | H-1→L (42%), H→L+1(38%)   |
| S4            | 623.1      | 0.7646              | H-1→L+1(49%), H→L (31%)   |
| S5            | 537.8      | 0.1645              | H →L+2(42%), H-1→L+2(37%) |
| S6            | 521.6      | 0.3791              | H-2→L(58%), H →L+2(10%)   |
| S7            | 516.4      | 0.0569              | H-1→L+2(36%), H →L+2(31%) |
| S8            | 505        | 0.0065              | H-3→L (77%), H-3→L+1(5%)  |
| S9            | 491.7      | 0.8481              | H-2→L+1(61%), H-1→L+2(6%) |
| S10           | 472.2      | 0.0870              | H-3→L+1(87%), H-3→L (5%)  |

**Table S5.** Selected computed excitation energies, oscillator strengths and molecular orbital compositions for low-lying excited states of **4-Ph**.

| Excited State | Wavelength | Oscillator strength | MO compositions            |
|---------------|------------|---------------------|----------------------------|
| S1            | 898.4      | 0.0818              | H→L (68%), H-1→L+1(22%)    |
| S2            | 812.5      | 0.0190              | H-1→L (46%), H→L+1(43%)    |
| S3            | 644.8      | 0.2845              | H-1→L+1(33%), H-2→L (22%)  |
| S4            | 618.7      | 0.5489              | H-2→L (26%), H-1→L+1(26%)  |
| S5            | 596.9      | 0.4859              | H-2→L (36%), H→L+1(22%)    |
| S6            | 568.6      | 0.1064              | H-3→L (65%), H-2→L (13%)   |
| S7            | 537.2      | 0.1817              | H-2→L+1(64%), H-3→L+1(16%) |
| S8            | 527.9      | 0.0184              | H-4→L (74%), H-3→L+1(11%)  |
| S9            | 509.5      | 0.3951              | H-3→L+1(56%), H-2→L+1(14%) |
| S10           | 500.7      | 0.1104              | H-5→L (48%), H-7→L (15%)   |

**Table S6.** Selected computed excitation energies, oscillator strengths and molecular orbital compositions for low-lying excited states of **4-Cl**.

| Excited State | Wavelength | Oscillator strength | MO compositions            |
|---------------|------------|---------------------|----------------------------|
| S1            | 895.4      | 0.1294              | H-1→L+1 (18%), H→L (64%)   |
| S2            | 832.7      | 0.0429              | H-1→L (40%), H→L+1 (42%)   |
| S3            | 643.0      | 0.3980              | H-1→L (34%), H→L+1 (32%)   |
| S4            | 606.2      | 0.9834              | H-1→L+1 (53%), H→L (14%)   |
| S5            | 580.4      | 0.0220              | H-2→L (35%), H→L+2 (58%)   |
| S6            | 573.4      | 0.0851              | H-2→L (48%), H→L+2 (37%)   |
| S7            | 539.5      | 0.1453              | H-1→L+2 (75%)              |
| S8            | 517.2      | 0.1300              | H-3→L (75%), H-2→L+1 (11%) |
| S9            | 507.8      | 0.1359              | H-4→L (27%), H-2→L+1 (49%) |
| S10           | 500.0      | 0.1868              | H-4→L (53%), H-2→L+1 (20%) |

**Table S7.** Selected computed excitation energies, oscillator strengths and molecular orbital compositions for low-lying excited states of **5**.

| Excited State | Wavelength | Oscillator strength | MO compositions             |
|---------------|------------|---------------------|-----------------------------|
| S1            | 832.8      | 0.0988              | H→L (73%), H-1→L+1(21%)     |
| S2            | 799.4      | 0.0410              | H→L+1(62%), H-1→L (26%)     |
| S3            | 741.4      | 0.0059              | H→L+2 (76%), H-1→L (19%)    |
| S4            | 673.9      | 0.1178              | H-1→L+2 (68%), H-1→L (9%)   |
| S5            | 566.4      | 0.6701              | H-1→L+1 (56%), H→L (16%)    |
| S6            | 554.5      | 1.0250              | H-1→L (39%), H→L+1(21%)     |
| S7            | 535        | 0.1413              | H-2→L (39%), H-2→L+2 (25%)  |
| S8            | 489.7      | 0.1794              | H-2→L (54%), H-2→L+2 (26%)  |
| S9            | 467        | 0.5857              | H-2→L+1 (64%)               |
| S10           | 459        | 0.0140              | H→L+3 (27%), H-10→L+2 (15%) |

**Table S8.** Contour plots of the frontier molecular orbitals for compounds **1**, **2**, **3**, **4-Ph**, **4-Cl** and **5**.

| Compounds   | HOMO                                                                                | LUMO                                                                                  |
|-------------|-------------------------------------------------------------------------------------|---------------------------------------------------------------------------------------|
| <b>1</b>    | 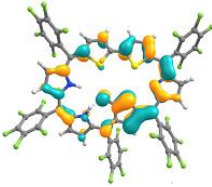   |    |
| <b>2</b>    |    |    |
| <b>3</b>    |    |    |
| <b>4-Ph</b> |   |   |
| <b>4-Cl</b> |  |  |
| <b>5</b>    |  |  |

**Table S9.** Calculated energy levels of the frontier molecular orbitals of compounds **1**, **2**, **3**, **4-Ph**, **4-Cl** and **5**.

| Compounds   | $E_{\text{HOMO}}$ (eV) | $E_{\text{LUMO}}$ (eV) | H-L gap(eV) |
|-------------|------------------------|------------------------|-------------|
| <b>1</b>    | -5.28                  | -3.36                  | 1.92        |
| <b>2</b>    | -5.26                  | -3.52                  | 1.74        |
| <b>3</b>    | -5.20                  | -3.36                  | 1.84        |
| <b>4-Ph</b> | -5.11                  | -3.34                  | 1.77        |
| <b>4-Cl</b> | -5.18                  | -3.43                  | 1.75        |
| <b>5</b>    | -4.92                  | -3.10                  | 1.82        |

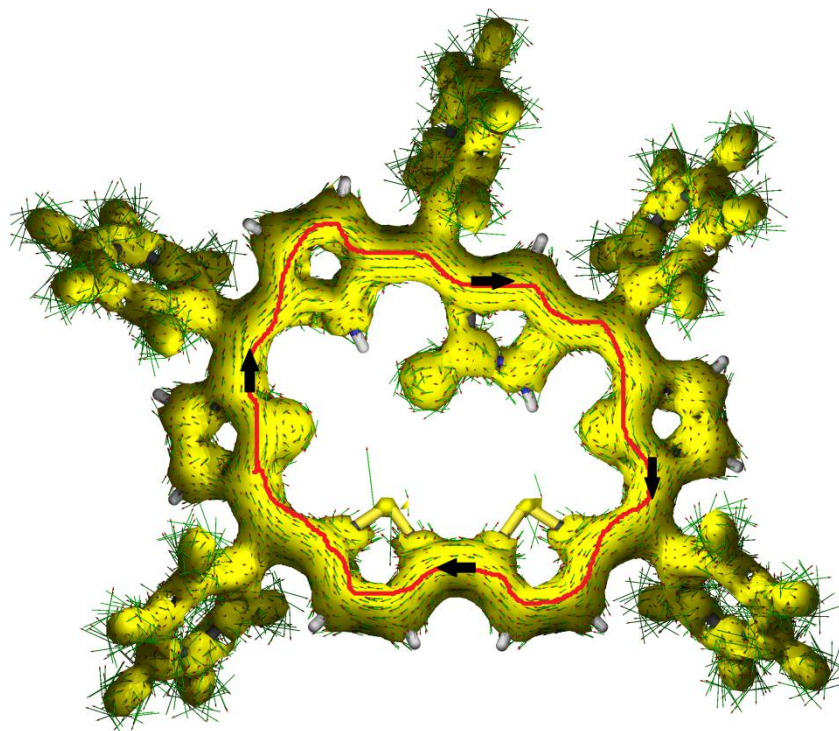

**Figure S34.** ACID plots of **1**. Direction of the applied magnetic field is perpendicular to the paper and pointing outward. The current density vectors indicate clockwise current.

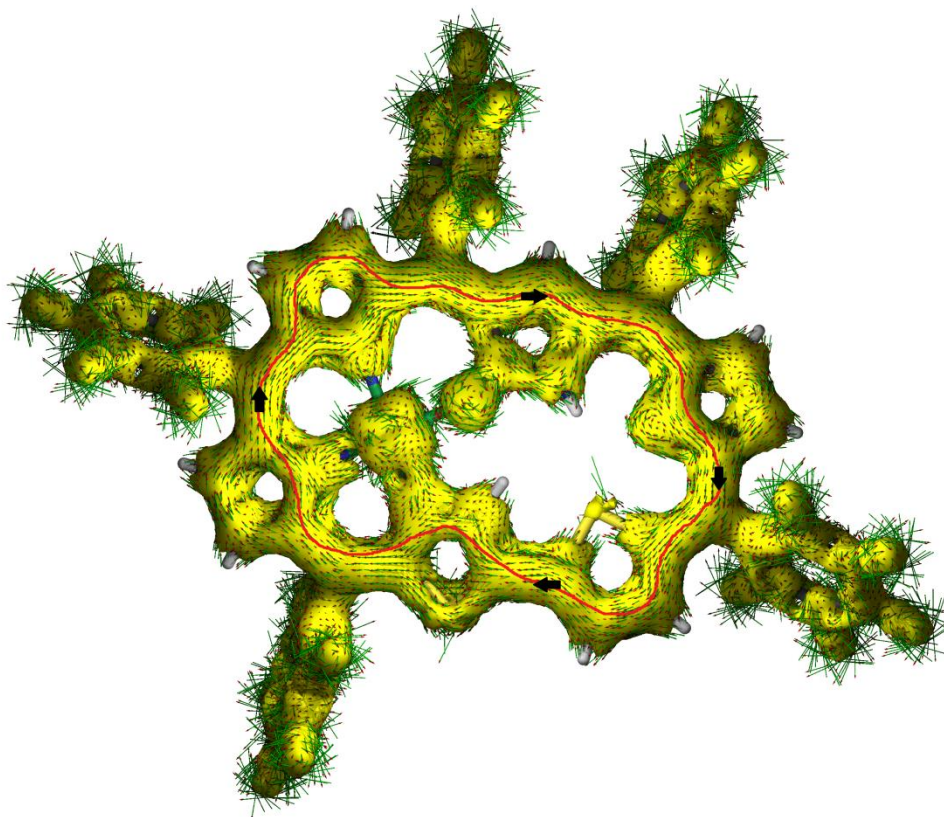

---

**Figure S35.** ACID plots of **2**. Direction of the applied magnetic field is perpendicular to the paper and pointing outward. The current density vectors indicate clockwise current.

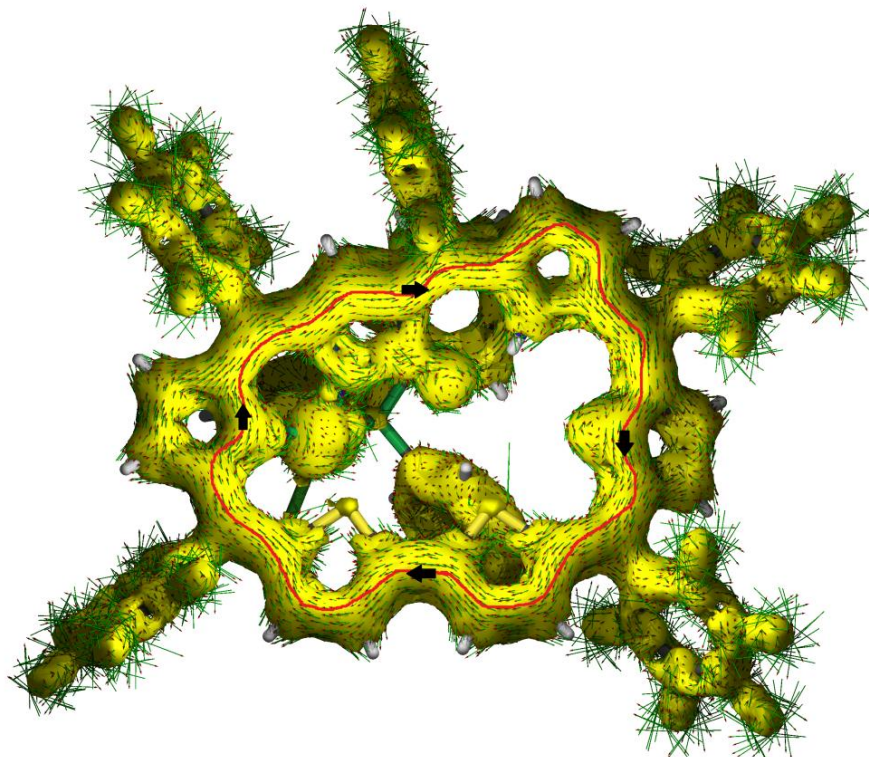

**Figure S36.** ACID plots of **3**. Direction of the applied magnetic field is perpendicular to the paper and pointing outward. The current density vectors indicate clockwise current.

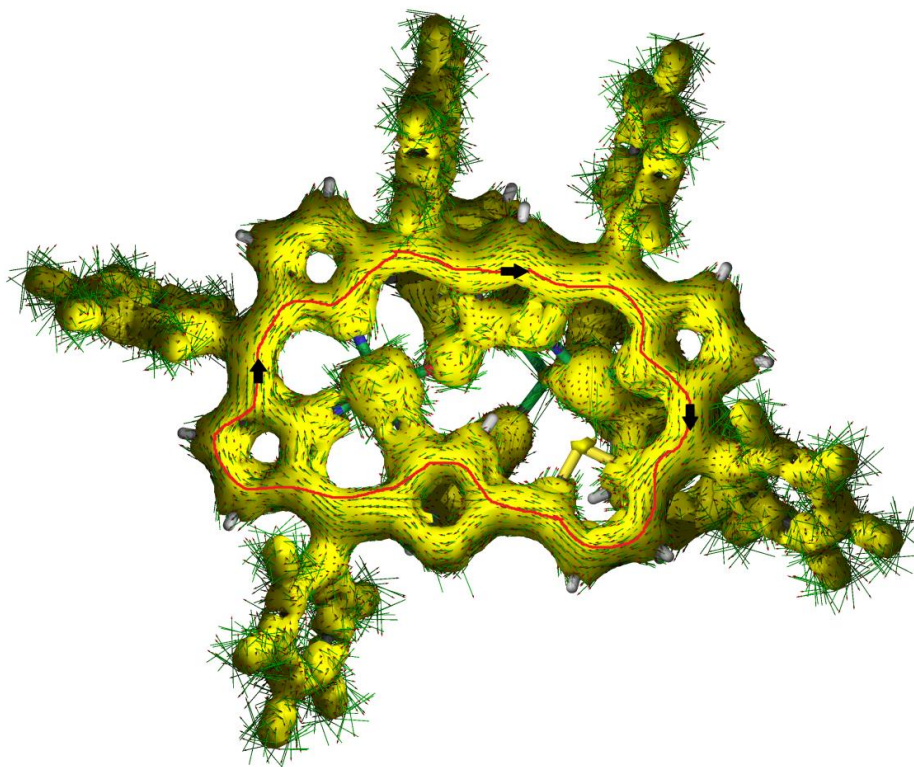

---

**Figure S37.** ACID plots of **4-Ph**. Direction of the applied magnetic field is perpendicular to the paper and pointing outward. The current density vectors indicate clockwise current.

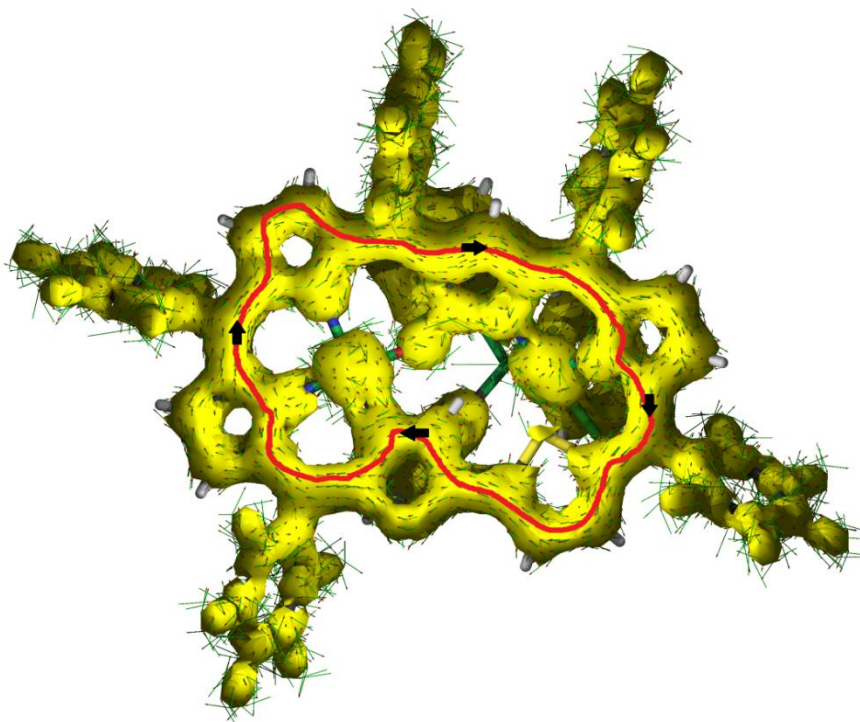

**Figure S38.** ACID plots of **4-Cl**. Direction of the applied magnetic field is perpendicular to the paper and pointing outward. The current density vectors indicate clockwise current.

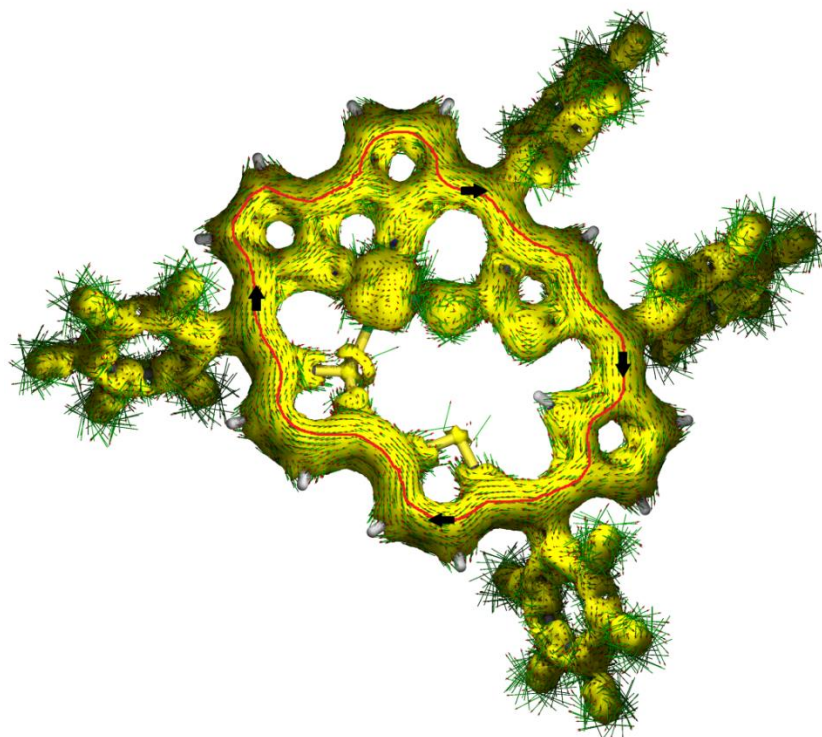

**Figure S39.** ACID plots of **5**. Direction of the applied magnetic field is perpendicular to the paper and pointing outward.

The current density vectors indicate clockwise current.

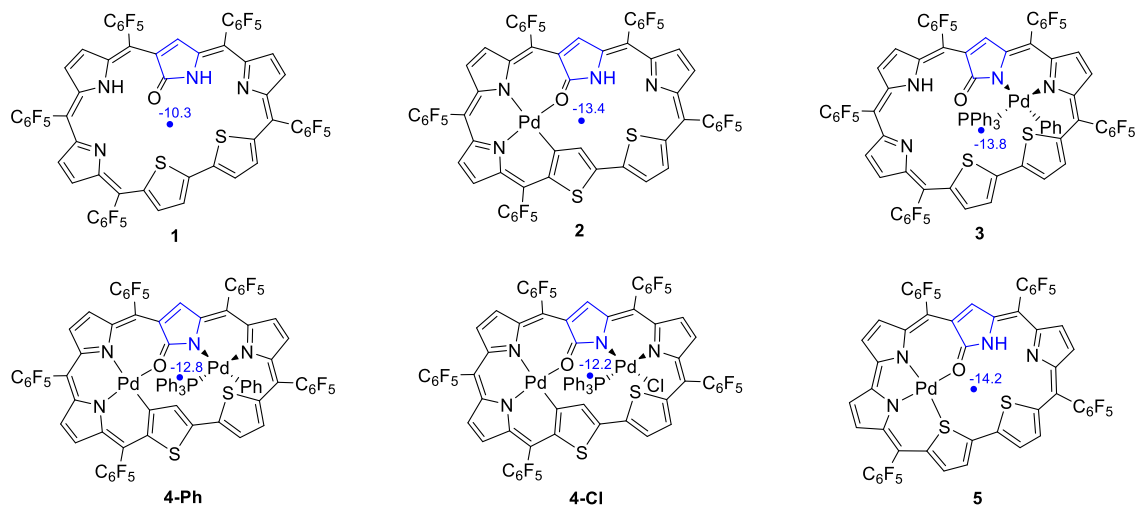

**Figure S40.** NICS(0) values of **1**, **2**, **3**, **4-Ph**, **4-Cl** and **5**.



---

**Table S10.** Cartesian coordinates of the optimized structures for compounds **1**, **2**, **3**, **4-Ph**, **4-Cl** and **5**.

| <b>1</b> |        |          |          |          |
|----------|--------|----------|----------|----------|
| Row      | Symbol | X        | Y        | Z        |
| 1        | S      | 1.336769 | -2.77626 | -0.18517 |
| 2        | C      | 2.795093 | -3.75084 | -0.34884 |
| 3        | C      | 2.451731 | -5.07055 | -0.71716 |
| 4        | H      | 3.197536 | -5.83273 | -0.90021 |
| 5        | C      | 1.095163 | -5.29822 | -0.81938 |
| 6        | H      | 0.670698 | -6.25894 | -1.08364 |
| 7        | C      | 0.310448 | -4.16776 | -0.53178 |
| 8        | C      | -1.10708 | -4.1833  | -0.48208 |
| 9        | S      | -2.10452 | -2.78417 | -0.13755 |
| 10       | C      | -3.58746 | -3.73494 | -0.19873 |
| 11       | C      | -3.26949 | -5.07452 | -0.50049 |
| 12       | C      | -1.91694 | -5.32094 | -0.66004 |
| 13       | H      | -1.51685 | -6.30172 | -0.88594 |
| 14       | H      | -4.03003 | -5.83841 | -0.60451 |
| 15       | C      | -4.88487 | -3.2147  | 0.021388 |
| 16       | C      | -5.1784  | -1.85934 | 0.222972 |
| 17       | N      | -4.22948 | -0.88161 | 0.195534 |
| 18       | C      | -4.88322 | 0.291136 | 0.366015 |
| 19       | C      | -6.31596 | 0.060737 | 0.539756 |
| 20       | C      | -6.49902 | -1.28087 | 0.453389 |
| 21       | H      | -7.42874 | -1.82577 | 0.542211 |
| 22       | H      | -7.0673  | 0.818775 | 0.713204 |
| 23       | C      | -4.24074 | 1.560197 | 0.346982 |
| 24       | C      | -2.8559  | 1.708004 | 0.236832 |
| 25       | N      | -1.96186 | 0.646651 | 0.250142 |
| 26       | C      | -0.6632  | 1.072196 | 0.109924 |
| 27       | O      | 0.323255 | 0.338517 | 0.099181 |
| 28       | C      | -0.74788 | 2.569855 | -0.02307 |
| 29       | C      | -2.09839 | 2.894194 | 0.077995 |
| 30       | H      | -2.52693 | 3.883062 | 0.024458 |

---

|    |   |          |          |          |
|----|---|----------|----------|----------|
| 31 | C | 0.313722 | 3.477008 | -0.251   |
| 32 | C | 1.695398 | 3.249065 | -0.30764 |
| 33 | N | 2.41709  | 2.083231 | -0.1084  |
| 34 | H | 1.965603 | 1.174165 | 0.036184 |
| 35 | C | 3.769729 | 2.344102 | -0.15178 |
| 36 | C | 3.903426 | 3.751027 | -0.44224 |
| 37 | C | 2.661384 | 4.291153 | -0.54255 |
| 38 | H | 2.416713 | 5.319542 | -0.75948 |
| 39 | H | 4.84338  | 4.264888 | -0.56998 |
| 40 | C | 4.863536 | 1.500807 | 0.092171 |
| 41 | C | 4.94245  | 0.091102 | 0.26738  |
| 42 | N | 3.99468  | -0.84422 | 0.009055 |
| 43 | C | 4.624598 | -2.04907 | 0.190591 |
| 44 | C | 6.004966 | -1.85996 | 0.642869 |
| 45 | C | 6.203143 | -0.52871 | 0.695902 |
| 46 | H | 7.098074 | -0.01066 | 1.007664 |
| 47 | H | 6.705335 | -2.63976 | 0.904129 |
| 48 | C | 4.116531 | -3.33502 | -0.06282 |
| 49 | C | 5.123879 | -4.44974 | -0.0237  |
| 50 | C | 5.159559 | -5.36798 | 1.031165 |
| 51 | F | 4.279888 | -5.26719 | 2.035931 |
| 52 | C | 6.093622 | -6.39976 | 1.080739 |
| 53 | F | 6.105254 | -7.2575  | 2.106815 |
| 54 | C | 7.02348  | -6.53428 | 0.051876 |
| 55 | F | 7.922406 | -7.52008 | 0.088312 |
| 56 | C | 7.012313 | -5.63865 | -1.01478 |
| 57 | F | 7.901477 | -5.76976 | -2.00479 |
| 58 | C | 6.06926  | -4.61332 | -1.04157 |
| 59 | F | 6.085523 | -3.77253 | -2.08245 |
| 60 | C | 6.181392 | 2.22043  | 0.169015 |
| 61 | C | 6.524394 | 3.008687 | 1.272524 |
| 62 | F | 5.663549 | 3.146932 | 2.289614 |
| 63 | C | 7.748248 | 3.668507 | 1.358854 |

---

|    |   |          |          |          |
|----|---|----------|----------|----------|
| 64 | F | 8.045778 | 4.412277 | 2.429903 |
| 65 | C | 8.667953 | 3.54742  | 0.319633 |
| 66 | F | 9.843543 | 4.175663 | 0.390435 |
| 67 | C | 8.357497 | 2.770663 | -0.79438 |
| 68 | F | 9.238092 | 2.65769  | -1.79452 |
| 69 | C | 7.127178 | 2.120451 | -0.857   |
| 70 | F | 6.86123  | 1.382521 | -1.94153 |
| 71 | C | -0.11195 | 4.90472  | -0.43715 |
| 72 | C | -0.66921 | 5.345035 | -1.64184 |
| 73 | C | -0.80419 | 4.49292  | -2.66601 |
| 74 | C | -1.09571 | 6.659014 | -1.82081 |
| 75 | F | -1.61936 | 7.05056  | -2.98711 |
| 76 | C | -0.97023 | 7.570218 | -0.77425 |
| 77 | F | -1.37345 | 8.832064 | -0.93515 |
| 78 | C | -0.42144 | 7.162308 | 0.439396 |
| 79 | F | -0.30051 | 8.035797 | 1.444145 |
| 80 | C | -0.00472 | 5.841867 | 0.594975 |
| 81 | F | 0.520197 | 5.48135  | 1.772928 |
| 82 | C | -5.07341 | 2.792938 | 0.422057 |
| 83 | C | -5.9936  | 3.119422 | -0.58261 |
| 84 | F | -6.13001 | 2.32214  | -1.64991 |
| 85 | C | -6.78581 | 4.262755 | -0.51886 |
| 86 | F | -7.65134 | 4.544128 | -1.49838 |
| 87 | C | -6.66458 | 5.123719 | 0.56952  |
| 88 | F | -7.41567 | 6.224492 | 0.638943 |
| 89 | C | -5.75658 | 4.832436 | 1.584564 |
| 90 | F | -5.64225 | 5.654052 | 2.633515 |
| 91 | C | -4.98004 | 3.679069 | 1.502999 |
| 92 | F | -4.12792 | 3.427984 | 2.505924 |
| 93 | C | -6.01999 | -4.18733 | 0.017313 |
| 94 | C | -6.18142 | -5.12787 | 1.041436 |
| 95 | F | -5.30277 | -5.17475 | 2.05123  |
| 96 | C | -7.23977 | -6.03277 | 1.053647 |

---

|     |   |          |          |          |
|-----|---|----------|----------|----------|
| 97  | F | -7.36642 | -6.91579 | 2.049671 |
| 98  | C | -8.17526 | -6.00998 | 0.021581 |
| 99  | F | -9.1944  | -6.8712  | 0.024062 |
| 100 | C | -8.04375 | -5.08674 | -1.01293 |
| 101 | F | -8.93722 | -5.06756 | -2.00727 |
| 102 | C | -6.97436 | -4.19393 | -1.00644 |
| 103 | F | -6.87564 | -3.32653 | -2.02132 |
| 104 | H | -2.28325 | -0.31611 | 0.287316 |

**2**

| Row | Symbol | X         | Y         | Z         |
|-----|--------|-----------|-----------|-----------|
| 1   | Pd     | 2.104627  | -0.452205 | -0.60046  |
| 2   | O      | 0.214774  | 0.273904  | -1.177868 |
| 3   | C      | -0.562137 | 1.129374  | -0.701904 |
| 4   | N      | -1.902557 | 0.921429  | -0.573446 |
| 5   | H      | -2.406051 | 0.057192  | -0.755386 |
| 6   | C      | -2.551175 | 2.067233  | -0.105061 |
| 7   | C      | -1.551585 | 3.05503   | 0.055766  |
| 8   | C      | -0.299595 | 2.523215  | -0.28367  |
| 9   | C      | 0.930267  | 3.23142   | -0.3632   |
| 10  | C      | 2.264461  | 2.809408  | -0.542983 |
| 11  | N      | 2.858743  | 1.553174  | -0.476813 |
| 12  | C      | 4.210645  | 1.749573  | -0.549515 |
| 13  | C      | 5.221678  | 0.780382  | -0.379604 |
| 14  | C      | 5.055878  | -0.593573 | -0.129746 |
| 15  | N      | 3.878534  | -1.296243 | -0.147324 |
| 16  | C      | 4.163212  | -2.606578 | 0.153698  |
| 17  | C      | 3.243316  | -3.672705 | 0.182225  |
| 18  | C      | 1.901564  | -3.489379 | -0.168148 |
| 19  | S      | 0.693891  | -4.802565 | -0.066149 |
| 20  | C      | -0.56337  | -3.717718 | -0.633494 |
| 21  | C      | -1.974918 | -3.87878  | -0.579794 |
| 22  | S      | -2.839186 | -2.360469 | -0.420607 |
| 23  | C      | -4.397884 | -3.136751 | -0.468606 |

---

|    |   |            |           |           |
|----|---|------------|-----------|-----------|
| 24 | C | -4.214137  | -4.537218 | -0.566176 |
| 25 | H | -5.047688  | -5.227734 | -0.621023 |
| 26 | C | -2.880689  | -4.950072 | -0.601114 |
| 27 | H | -2.577174  | -5.988077 | -0.684743 |
| 28 | C | -5.592518  | -2.383383 | -0.359617 |
| 29 | C | -5.603226  | -0.976815 | -0.243483 |
| 30 | N | -4.470558  | -0.215616 | -0.285127 |
| 31 | C | -4.841156  | 1.056585  | -0.001773 |
| 32 | C | -3.930192  | 2.145198  | 0.125727  |
| 33 | C | -4.472317  | 3.4693    | 0.554241  |
| 34 | C | -4.207997  | 3.995877  | 1.823618  |
| 35 | F | -3.448397  | 3.311287  | 2.688833  |
| 36 | C | -4.713514  | 5.228731  | 2.230791  |
| 37 | F | -4.441835  | 5.703787  | 3.450464  |
| 38 | C | -5.513115  | 5.96564   | 1.360008  |
| 39 | F | -6.004839  | 7.145874  | 1.740815  |
| 40 | C | -5.797829  | 5.467685  | 0.090177  |
| 41 | F | -6.561931  | 6.175279  | -0.747693 |
| 42 | C | -5.275549  | 4.236125  | -0.29756  |
| 43 | F | -5.565004  | 3.787295  | -1.525675 |
| 44 | C | -6.285745  | 1.126593  | 0.210467  |
| 45 | H | -6.853423  | 2.012915  | 0.457552  |
| 46 | C | -6.75995   | -0.136465 | 0.048043  |
| 47 | H | -7.783332  | -0.470986 | 0.149012  |
| 48 | C | -6.889649  | -3.116698 | -0.328077 |
| 49 | C | -7.846165  | -2.941744 | -1.336766 |
| 50 | F | -7.600291  | -2.111671 | -2.357905 |
| 51 | C | -9.065071  | -3.615453 | -1.323471 |
| 52 | F | -9.953577  | -3.428277 | -2.304244 |
| 53 | C | -9.353735  | -4.496195 | -0.283368 |
| 54 | F | -10.517377 | -5.147909 | -0.262108 |
| 55 | C | -8.42357   | -4.69438  | 0.734699  |
| 56 | F | -8.70114   | -5.533539 | 1.73759   |

---

|    |   |           |           |           |
|----|---|-----------|-----------|-----------|
| 57 | C | -7.212652 | -4.007187 | 0.703903  |
| 58 | F | -6.349526 | -4.214015 | 1.707409  |
| 59 | C | -0.011618 | -2.468144 | -0.946661 |
| 60 | H | -0.608969 | -1.684174 | -1.381817 |
| 61 | C | 1.32322   | -2.284032 | -0.62577  |
| 62 | C | 3.728757  | -5.023827 | 0.586601  |
| 63 | C | 3.8291    | -6.070639 | -0.337838 |
| 64 | F | 3.508034  | -5.863193 | -1.620725 |
| 65 | C | 4.264068  | -7.340504 | 0.033245  |
| 66 | F | 4.353553  | -8.319125 | -0.872615 |
| 67 | C | 4.6168    | -7.585751 | 1.358669  |
| 68 | F | 5.037429  | -8.797776 | 1.723985  |
| 69 | C | 4.531136  | -6.563977 | 2.302174  |
| 70 | F | 4.867307  | -6.800873 | 3.573913  |
| 71 | C | 4.089908  | -5.302595 | 1.90997   |
| 72 | F | 4.01365   | -4.342877 | 2.840064  |
| 73 | C | 5.580943  | -2.730585 | 0.392005  |
| 74 | H | 6.090277  | -3.647949 | 0.650282  |
| 75 | C | 6.1321    | -1.50128  | 0.205588  |
| 76 | H | 7.171281  | -1.225165 | 0.307008  |
| 77 | C | 6.63706   | 1.2677    | -0.426113 |
| 78 | C | 7.463985  | 0.984201  | -1.518521 |
| 79 | F | 6.989091  | 0.274803  | -2.550279 |
| 80 | C | 8.786066  | 1.4199    | -1.576277 |
| 81 | F | 9.550099  | 1.134976  | -2.635798 |
| 82 | C | 9.311003  | 2.162125  | -0.52048  |
| 83 | F | 10.575484 | 2.586146  | -0.565345 |
| 84 | C | 8.51357   | 2.461363  | 0.582323  |
| 85 | F | 9.018321  | 3.170485  | 1.59721   |
| 86 | C | 7.195529  | 2.011636  | 0.618848  |
| 87 | F | 6.456563  | 2.312801  | 1.694291  |
| 88 | C | 4.498827  | 3.155754  | -0.755518 |
| 89 | H | 5.480242  | 3.585271  | -0.891383 |

---

|     |   |           |          |           |
|-----|---|-----------|----------|-----------|
| 90  | C | 3.313358  | 3.803378 | -0.742265 |
| 91  | H | 3.152336  | 4.862849 | -0.869603 |
| 92  | C | 0.75272   | 4.715158 | -0.194114 |
| 93  | C | 1.118108  | 5.363553 | 0.990083  |
| 94  | F | 1.668672  | 4.667472 | 1.991944  |
| 95  | C | 0.929932  | 6.732768 | 1.169029  |
| 96  | F | 1.290763  | 7.324231 | 2.311947  |
| 97  | C | 0.359191  | 7.487062 | 0.146191  |
| 98  | F | 0.175796  | 8.798997 | 0.305239  |
| 99  | C | -0.019641 | 6.869251 | -1.044454 |
| 100 | F | -0.564029 | 7.593538 | -2.02759  |
| 101 | C | 0.175836  | 5.498953 | -1.199097 |
| 102 | F | -0.198789 | 4.934264 | -2.354331 |
| 103 | H | -1.744427 | 4.061131 | 0.393587  |

### 3

| Row | Symbol | X         | Y         | Z        |
|-----|--------|-----------|-----------|----------|
| 1   | Pd     | 2.296358  | -0.749349 | 1.150257 |
| 2   | Cl     | 3.086605  | -2.7234   | 2.191234 |
| 3   | P      | 0.985524  | -0.401071 | 3.040858 |
| 4   | C      | -0.169143 | -1.784292 | 3.362905 |
| 5   | C      | -1.086806 | -2.129446 | 2.355698 |
| 6   | H      | -1.110952 | -1.566674 | 1.426867 |
| 7   | C      | -1.966713 | -3.194214 | 2.548507 |
| 8   | H      | -2.676535 | -3.456706 | 1.76988  |
| 9   | C      | -1.926668 | -3.931542 | 3.73484  |
| 10  | H      | -2.608001 | -4.766129 | 3.877486 |
| 11  | C      | -1.005971 | -3.60113  | 4.729638 |
| 12  | H      | -0.963496 | -4.178506 | 5.649222 |
| 13  | C      | -0.127473 | -2.531374 | 4.547534 |
| 14  | H      | 0.592549  | -2.289796 | 5.321596 |
| 15  | C      | 1.9704    | -0.133662 | 4.576251 |
| 16  | C      | 1.32035   | 0.361889  | 5.721717 |
| 17  | H      | 0.255195  | 0.571973  | 5.696163 |

---

|    |   |           |           |           |
|----|---|-----------|-----------|-----------|
| 18 | C | 2.036779  | 0.596994  | 6.89387   |
| 19 | H | 1.521603  | 0.97579   | 7.772432  |
| 20 | C | 3.412674  | 0.35581   | 6.933603  |
| 21 | H | 3.972075  | 0.54586   | 7.845789  |
| 22 | C | 4.065012  | -0.125591 | 5.7989    |
| 23 | H | 5.134521  | -0.315395 | 5.822323  |
| 24 | C | 3.35046   | -0.37308  | 4.623994  |
| 25 | H | 3.8579    | -0.77206  | 3.753971  |
| 26 | C | -0.031665 | 1.135254  | 2.998445  |
| 27 | C | 0.641627  | 2.3606    | 2.857251  |
| 28 | H | 1.724552  | 2.38399   | 2.774539  |
| 29 | C | -0.072753 | 3.555926  | 2.803462  |
| 30 | C | -1.467939 | 3.543153  | 2.887142  |
| 31 | H | -2.025374 | 4.47397   | 2.829946  |
| 32 | C | -2.142937 | 2.331538  | 3.036434  |
| 33 | C | -1.429457 | 1.131327  | 3.093264  |
| 34 | H | -1.967165 | 0.195597  | 3.197902  |
| 35 | H | -3.227557 | 2.31554   | 3.090619  |
| 36 | H | 0.458725  | 4.494122  | 2.676779  |
| 37 | N | 3.864792  | -0.698128 | -0.393752 |
| 38 | C | 4.787678  | -1.662513 | -0.698301 |
| 39 | C | 6.110351  | -1.069451 | -0.747946 |
| 40 | H | 7.025385  | -1.591405 | -0.990758 |
| 41 | C | 5.956281  | 0.265346  | -0.530528 |
| 42 | H | 6.725674  | 1.024272  | -0.537226 |
| 43 | C | 4.539148  | 0.497758  | -0.339724 |
| 44 | C | 3.902229  | 1.755169  | -0.282534 |
| 45 | C | 2.497302  | 1.884757  | -0.276375 |
| 46 | N | 1.632568  | 0.884682  | 0.111492  |
| 47 | C | 0.355014  | 1.243149  | -0.223662 |
| 48 | O | -0.650829 | 0.538106  | -0.066205 |
| 49 | C | 0.425022  | 2.639212  | -0.823316 |
| 50 | C | 1.775261  | 2.982683  | -0.802991 |



---

|    |   |           |           |           |
|----|---|-----------|-----------|-----------|
| 51 | H | 2.224459  | 3.881011  | -1.199716 |
| 52 | C | -0.619922 | 3.460437  | -1.291038 |
| 53 | C | -2.008311 | 3.252681  | -1.25779  |
| 54 | N | -2.71053  | 2.134855  | -0.852757 |
| 55 | H | -2.232755 | 1.280235  | -0.539757 |
| 56 | C | -4.053639 | 2.41899   | -0.782187 |
| 57 | C | -4.211816 | 3.780586  | -1.218139 |
| 58 | C | -2.981694 | 4.272732  | -1.539367 |
| 59 | H | -2.752088 | 5.259698  | -1.911359 |
| 60 | H | -5.159599 | 4.290039  | -1.306834 |
| 61 | C | -5.117087 | 1.604489  | -0.349841 |
| 62 | C | -5.191569 | 0.194641  | -0.249933 |
| 63 | N | -4.304657 | -0.709839 | -0.747064 |
| 64 | C | -4.917783 | -1.920403 | -0.611376 |
| 65 | C | -6.213267 | -1.78904  | 0.058447  |
| 66 | C | -6.37827  | -0.470812 | 0.29712   |
| 67 | H | -7.208829 | 0.00912   | 0.79466   |
| 68 | H | -6.881924 | -2.595533 | 0.323628  |
| 69 | C | -4.446275 | -3.162319 | -1.083087 |
| 70 | C | -3.162504 | -3.49989  | -1.556443 |
| 71 | S | -1.717198 | -2.497172 | -1.426205 |
| 72 | C | -0.683264 | -3.84062  | -1.915143 |
| 73 | C | -1.466008 | -4.960071 | -2.263988 |
| 74 | C | -2.816508 | -4.774112 | -2.067294 |
| 75 | H | -3.558205 | -5.537968 | -2.261824 |
| 76 | H | -1.037562 | -5.886146 | -2.626884 |
| 77 | C | 0.729731  | -3.854019 | -1.853842 |
| 78 | S | 1.724361  | -2.471636 | -1.441945 |
| 79 | C | 3.184763  | -3.458807 | -1.383362 |
| 80 | C | 2.863179  | -4.795717 | -1.710883 |
| 81 | C | 1.527216  | -5.012769 | -1.9762   |
| 82 | H | 1.117757  | -5.989556 | -2.202076 |
| 83 | H | 3.606364  | -5.58271  | -1.713743 |

---

|     |   |           |           |           |
|-----|---|-----------|-----------|-----------|
| 84  | C | 4.478883  | -2.976438 | -1.089145 |
| 85  | F | 6.190229  | -3.809495 | 1.04162   |
| 86  | C | 6.433148  | -4.290716 | -0.179169 |
| 87  | C | 5.622304  | -3.921518 | -1.261812 |
| 88  | C | 5.950057  | -4.463097 | -2.51226  |
| 89  | F | 5.230231  | -4.138136 | -3.595083 |
| 90  | C | 7.019143  | -5.338096 | -2.68353  |
| 91  | C | 7.803119  | -5.688235 | -1.58634  |
| 92  | C | 7.510734  | -5.162027 | -0.330665 |
| 93  | F | 8.262692  | -5.497824 | 0.722505  |
| 94  | F | 8.832522  | -6.523692 | -1.739669 |
| 95  | F | 7.303997  | -5.833765 | -3.893011 |
| 96  | C | -5.429458 | -4.295052 | -1.038443 |
| 97  | C | -6.494852 | -4.372913 | -1.941446 |
| 98  | C | -7.421917 | -5.412737 | -1.899247 |
| 99  | C | -7.295145 | -6.408331 | -0.93313  |
| 100 | C | -6.24503  | -6.358831 | -0.018146 |
| 101 | C | -5.330263 | -5.310969 | -0.081855 |
| 102 | F | -4.334317 | -5.292067 | 0.817899  |
| 103 | F | -6.125643 | -7.311236 | 0.913025  |
| 104 | F | -8.177473 | -7.408183 | -0.883084 |
| 105 | F | -8.42748  | -5.462349 | -2.778631 |
| 106 | F | -6.644533 | -3.434588 | -2.882886 |
| 107 | C | -6.361746 | 2.362187  | 0.001223  |
| 108 | C | -7.52601  | 2.282418  | -0.772772 |
| 109 | C | -8.682607 | 2.985479  | -0.442442 |
| 110 | C | -8.694677 | 3.79899   | 0.688677  |
| 111 | C | -7.552532 | 3.903563  | 1.479532  |
| 112 | C | -6.408396 | 3.191934  | 1.128035  |
| 113 | F | -5.329736 | 3.317348  | 1.91762   |
| 114 | F | -7.562839 | 4.680949  | 2.567775  |
| 115 | F | -9.797157 | 4.477007  | 1.013427  |
| 116 | F | -9.77617  | 2.891048  | -1.205861 |

---

|     |   |           |          |           |
|-----|---|-----------|----------|-----------|
| 117 | F | -7.549496 | 1.519825 | -1.871636 |
| 118 | C | -0.18949  | 4.796764 | -1.824763 |
| 119 | C | 0.057329  | 5.880457 | -0.977198 |
| 120 | C | 0.479559  | 7.115819 | -1.463148 |
| 121 | C | 0.665393  | 7.286762 | -2.83368  |
| 122 | C | 0.428445  | 6.225395 | -3.704414 |
| 123 | C | 0.007532  | 4.9987   | -3.19369  |
| 124 | F | -0.210897 | 3.997702 | -4.055028 |
| 125 | F | 0.605701  | 6.389456 | -5.019095 |
| 126 | F | 1.068336  | 8.466207 | -3.31085  |
| 127 | F | 0.703149  | 8.135421 | -0.627014 |
| 128 | F | -0.117637 | 5.75044  | 0.346531  |
| 129 | C | 4.708372  | 3.002343 | -0.361645 |
| 130 | C | 4.693248  | 3.919818 | 0.697919  |
| 131 | C | 5.422888  | 5.105115 | 0.663999  |
| 132 | C | 6.195002  | 5.40322  | -0.456775 |
| 133 | C | 6.229907  | 4.516161 | -1.530662 |
| 134 | C | 5.488551  | 3.338154 | -1.475593 |
| 135 | F | 5.530465  | 2.523031 | -2.538044 |
| 136 | F | 6.961314  | 4.807576 | -2.611486 |
| 137 | F | 6.899164  | 6.535695 | -0.501917 |
| 138 | F | 5.392506  | 5.952619 | 1.697603  |
| 139 | F | 3.975661  | 3.660229 | 1.801786  |

#### 4-Ph

| Row | Symbol | X         | Y         | Z         |
|-----|--------|-----------|-----------|-----------|
| 1   | Pd     | 2.698486  | -0.397278 | -0.421667 |
| 2   | N      | 4.471836  | -1.346849 | -0.634645 |
| 3   | C      | 4.70436   | -2.691845 | -0.78651  |
| 4   | C      | 3.733068  | -3.683007 | -1.059391 |
| 5   | C      | 2.375358  | -3.370489 | -1.148772 |
| 6   | S      | 1.116014  | -4.5553   | -1.625938 |
| 7   | C      | -0.129229 | -3.320633 | -1.497949 |

---

|    |    |           |           |           |
|----|----|-----------|-----------|-----------|
| 8  | C  | -1.532066 | -3.423413 | -1.658335 |
| 9  | S  | -2.378614 | -1.899762 | -1.447549 |
| 10 | C  | -3.943933 | -2.65269  | -1.545196 |
| 11 | C  | -5.116917 | -1.869697 | -1.415494 |
| 12 | C  | -5.081513 | -0.504857 | -1.054955 |
| 13 | N  | -3.93171  | 0.155498  | -0.682032 |
| 14 | Pd | -2.606421 | -0.229352 | 1.134218  |
| 15 | P  | -1.56216  | -0.146507 | 3.232508  |
| 16 | C  | -2.645199 | 0.003564  | 4.728976  |
| 17 | C  | -3.357181 | -1.116067 | 5.194531  |
| 18 | H  | -3.276784 | -2.067519 | 4.681453  |
| 19 | C  | -4.177271 | -1.017909 | 6.317483  |
| 20 | H  | -4.71758  | -1.896041 | 6.659959  |
| 21 | C  | -4.312674 | 0.198918  | 6.989192  |
| 22 | H  | -4.956013 | 0.273777  | 7.861852  |
| 23 | C  | -3.615177 | 1.316518  | 6.532646  |
| 24 | H  | -3.707255 | 2.268412  | 7.048723  |
| 25 | C  | -2.783809 | 1.220498  | 5.414176  |
| 26 | H  | -2.23861  | 2.098473  | 5.088089  |
| 27 | C  | -0.473159 | -1.580018 | 3.609733  |
| 28 | C  | -0.198856 | -1.984967 | 4.926617  |
| 29 | H  | -0.666461 | -1.476318 | 5.763108  |
| 30 | C  | 0.672288  | -3.048279 | 5.167836  |
| 31 | H  | 0.87433   | -3.355013 | 6.190608  |
| 32 | C  | 1.28063   | -3.714165 | 4.101589  |
| 33 | H  | 1.956827  | -4.54322  | 4.292206  |
| 34 | C  | 1.019946  | -3.31283  | 2.789876  |
| 35 | H  | 1.498108  | -3.822466 | 1.958405  |
| 36 | C  | 0.145587  | -2.252157 | 2.544744  |
| 37 | H  | -0.04215  | -1.93251  | 1.525954  |
| 38 | C  | -0.478106 | 1.33547   | 3.352597  |
| 39 | C  | 0.820059  | 1.277766  | 3.877226  |
| 40 | H  | 1.237216  | 0.330578  | 4.201655  |

---

|    |   |           |           |           |
|----|---|-----------|-----------|-----------|
| 41 | C | 1.588902  | 2.439986  | 3.975968  |
| 42 | H | 2.597297  | 2.381851  | 4.376501  |
| 43 | C | 1.070279  | 3.665924  | 3.557261  |
| 44 | H | 1.674232  | 4.566209  | 3.624461  |
| 45 | C | -0.223767 | 3.730687  | 3.034439  |
| 46 | H | -0.631754 | 4.673867  | 2.686254  |
| 47 | C | -0.989002 | 2.571385  | 2.924225  |
| 48 | H | -1.983391 | 2.628896  | 2.493139  |
| 49 | N | -1.277592 | 1.126847  | 0.027748  |
| 50 | C | 0.065666  | 1.23981   | -0.050266 |
| 51 | O | 0.846357  | 0.306821  | 0.287198  |
| 52 | C | 0.43624   | 2.600194  | -0.572979 |
| 53 | C | 1.70239   | 3.219323  | -0.703595 |
| 54 | C | 3.030396  | 2.787069  | -0.466209 |
| 55 | N | 3.567342  | 1.525496  | -0.281506 |
| 56 | C | 4.921933  | 1.669469  | -0.171619 |
| 57 | C | 5.881546  | 0.634995  | -0.126589 |
| 58 | C | 5.668581  | -0.739751 | -0.340744 |
| 59 | C | 6.702958  | -1.750103 | -0.313036 |
| 60 | C | 6.11151   | -2.943576 | -0.594414 |
| 61 | H | 6.584964  | -3.913308 | -0.652876 |
| 62 | H | 7.747643  | -1.570207 | -0.106015 |
| 63 | C | 7.295152  | 1.057385  | 0.126259  |
| 64 | C | 8.262395  | 1.048019  | -0.884668 |
| 65 | C | 9.57766   | 1.444194  | -0.651628 |
| 66 | C | 9.951849  | 1.870024  | 0.62112   |
| 67 | C | 9.011719  | 1.894608  | 1.648921  |
| 68 | C | 7.703542  | 1.490308  | 1.392487  |
| 69 | F | 6.825675  | 1.522813  | 2.404057  |
| 70 | F | 9.370933  | 2.299928  | 2.871921  |
| 71 | F | 11.2088   | 2.253587  | 0.855297  |
| 72 | F | 10.478594 | 1.425354  | -1.639717 |
| 73 | F | 7.934881  | 0.651889  | -2.12131  |

---

|     |   |           |          |           |
|-----|---|-----------|----------|-----------|
| 74  | C | 5.270508  | 3.075086 | -0.21498  |
| 75  | H | 6.268005  | 3.481784 | -0.13384  |
| 76  | C | 4.119056  | 3.755914 | -0.42503  |
| 77  | H | 4.009647  | 4.825027 | -0.524782 |
| 78  | C | 1.609387  | 4.639379 | -1.204108 |
| 79  | C | 1.322355  | 5.721108 | -0.368897 |
| 80  | C | 1.216283  | 7.022931 | -0.854086 |
| 81  | C | 1.394657  | 7.266037 | -2.214261 |
| 82  | C | 1.680004  | 6.208416 | -3.07485  |
| 83  | C | 1.783825  | 4.916152 | -2.563611 |
| 84  | F | 2.059903  | 3.92242  | -3.41722  |
| 85  | F | 1.852305  | 6.439118 | -4.380257 |
| 86  | F | 1.294308  | 8.509175 | -2.690372 |
| 87  | F | 0.948527  | 8.037296 | -0.023709 |
| 88  | F | 1.156077  | 5.529248 | 0.949109  |
| 89  | C | -0.797947 | 3.215901 | -0.815526 |
| 90  | H | -0.957996 | 4.194519 | -1.24185  |
| 91  | C | -1.826806 | 2.303257 | -0.469615 |
| 92  | C | -3.211214 | 2.516725 | -0.666627 |
| 93  | C | -4.19678  | 1.498471 | -0.737878 |
| 94  | C | -5.604973 | 1.695663 | -1.037878 |
| 95  | H | -6.10648  | 2.649548 | -1.125197 |
| 96  | C | -6.153028 | 0.460785 | -1.216691 |
| 97  | H | -7.173671 | 0.236921 | -1.493494 |
| 98  | C | -3.639894 | 3.92118  | -0.933305 |
| 99  | C | -3.555788 | 4.902191 | 0.062612  |
| 100 | C | -3.937718 | 6.222575 | -0.159227 |
| 101 | C | -4.419771 | 6.595431 | -1.412009 |
| 102 | C | -4.51466  | 5.64685  | -2.428027 |
| 103 | C | -4.123259 | 4.332562 | -2.18203  |
| 104 | F | -4.212691 | 3.454775 | -3.18904  |
| 105 | F | -4.968483 | 6.005683 | -3.633293 |
| 106 | F | -4.790217 | 7.857331 | -1.637746 |

---

|     |   |            |           |           |
|-----|---|------------|-----------|-----------|
| 107 | F | -3.851154  | 7.12925   | 0.820014  |
| 108 | F | -3.11224   | 4.582269  | 1.290611  |
| 109 | C | -3.949724  | -1.46484  | 1.991553  |
| 110 | C | -5.198751  | -0.980121 | 2.403388  |
| 111 | H | -5.432463  | 0.077782  | 2.311117  |
| 112 | C | -6.155902  | -1.845348 | 2.943329  |
| 113 | H | -7.119928  | -1.451384 | 3.258012  |
| 114 | C | -5.874137  | -3.205518 | 3.089942  |
| 115 | H | -6.616362  | -3.876443 | 3.514975  |
| 116 | C | -4.63422   | -3.697654 | 2.678705  |
| 117 | H | -4.405661  | -4.756259 | 2.781554  |
| 118 | C | -3.677282  | -2.833072 | 2.132573  |
| 119 | H | -2.712711  | -3.234151 | 1.831702  |
| 120 | C | -6.422865  | -2.492666 | -1.790057 |
| 121 | C | -7.10032   | -2.111666 | -2.955678 |
| 122 | C | -8.314104  | -2.683516 | -3.329104 |
| 123 | C | -8.87635   | -3.682361 | -2.537848 |
| 124 | C | -8.220466  | -4.09799  | -1.382244 |
| 125 | C | -7.010786  | -3.505837 | -1.024529 |
| 126 | F | -6.406089  | -3.945607 | 0.085023  |
| 127 | F | -8.75323   | -5.061378 | -0.622368 |
| 128 | F | -10.036806 | -4.241228 | -2.888288 |
| 129 | F | -8.93485   | -2.288401 | -4.44592  |
| 130 | F | -6.584873  | -1.167284 | -3.755082 |
| 131 | C | -3.783799  | -4.0393   | -1.797399 |
| 132 | H | -4.626517  | -4.711591 | -1.907087 |
| 133 | C | -2.457856  | -4.46604  | -1.854376 |
| 134 | H | -2.168372  | -5.500475 | -2.007225 |
| 135 | C | 0.452626   | -2.097296 | -1.126041 |
| 136 | H | -0.141342  | -1.210528 | -0.9765   |
| 137 | C | 1.814275   | -2.098213 | -0.903066 |
| 138 | C | 4.17952    | -5.09352  | -1.239849 |
| 139 | C | 4.914567   | -5.498152 | -2.360162 |

---

|     |   |          |           |           |
|-----|---|----------|-----------|-----------|
| 140 | C | 5.317845 | -6.81955  | -2.537966 |
| 141 | C | 4.982598 | -7.775416 | -1.581325 |
| 142 | C | 4.250895 | -7.405185 | -0.454861 |
| 143 | C | 3.861534 | -6.078002 | -0.296346 |
| 144 | F | 3.170786 | -5.753709 | 0.807338  |
| 145 | F | 3.936815 | -8.320737 | 0.467562  |
| 146 | F | 5.363334 | -9.043994 | -1.74266  |
| 147 | F | 6.016943 | -7.176672 | -3.619782 |
| 148 | F | 5.246765 | -4.605376 | -3.30012  |

**4-Cl**

| Row | Symbol | X        | Y        | Z        |
|-----|--------|----------|----------|----------|
| 1   | H      | 1.230837 | -3.02192 | 6.140528 |
| 2   | C      | 0.92003  | -2.85082 | 5.113468 |
| 3   | C      | 0.005492 | -1.83743 | 4.828985 |
| 4   | H      | -0.39272 | -1.23142 | 5.636825 |
| 5   | C      | -0.40505 | -1.60803 | 3.503651 |
| 6   | C      | 0.107572 | -2.41029 | 2.476607 |
| 7   | C      | 1.024085 | -3.42381 | 2.765602 |
| 8   | C      | 1.430381 | -3.64392 | 4.082348 |
| 9   | H      | 2.141416 | -4.43468 | 4.305942 |
| 10  | H      | 1.422528 | -4.03703 | 1.963329 |
| 11  | H      | -0.20668 | -2.23852 | 1.454398 |
| 12  | P      | -1.55837 | -0.24463 | 3.09729  |
| 13  | C      | -2.72924 | -0.19891 | 4.527704 |
| 14  | C      | -3.13356 | 1.010526 | 5.112782 |
| 15  | C      | -4.03154 | 1.015792 | 6.18197  |
| 16  | C      | -4.53226 | -0.18427 | 6.685558 |
| 17  | H      | -5.22928 | -0.17897 | 7.51926  |
| 18  | C      | -4.12962 | -1.39314 | 6.114368 |
| 19  | H      | -4.51331 | -2.33417 | 6.498581 |
| 20  | C      | -3.24048 | -1.4042  | 5.041186 |



---

|    |    |          |          |          |
|----|----|----------|----------|----------|
| 21 | H  | -2.94954 | -2.34905 | 4.599683 |
| 22 | H  | -4.33116 | 1.962744 | 6.622681 |
| 23 | H  | -2.7431  | 1.954851 | 4.752522 |
| 24 | C  | -0.60331 | 1.31836  | 3.262342 |
| 25 |    | 0.702604 | 1.349486 | 3.770442 |
| 26 | H  | 1.203288 | 0.42935  | 4.050114 |
| 27 | C  | 1.373105 | 2.567104 | 3.909473 |
| 28 | H  | 2.387368 | 2.576792 | 4.298977 |
| 29 | C  | 0.750802 | 3.760978 | 3.54375  |
| 30 | H  | 1.278456 | 4.705096 | 3.643477 |
| 31 | C  | -0.54797 | 3.737247 | 3.029824 |
| 32 | C  | -1.21657 | 2.523892 | 2.881219 |
| 33 | H  | -2.21398 | 2.518563 | 2.453209 |
| 34 | H  | -1.03507 | 4.655297 | 2.717423 |
| 35 | Pd | -2.64212 | -0.38139 | 1.017307 |
| 36 | N  | -1.49642 | 1.05425  | 0.053685 |
| 37 | C  | -0.15028 | 1.194871 | -0.02971 |
| 38 | O  | 0.648819 | 0.282463 | 0.307428 |
| 39 | Pd | 2.536944 | -0.34962 | -0.39292 |
| 40 | N  | 4.34839  | -1.23351 | -0.56398 |
| 41 | C  | 4.630887 | -2.57144 | -0.6987  |
| 42 | C  | 6.043277 | -2.77117 | -0.48051 |
| 43 | H  | 6.551357 | -3.72411 | -0.52179 |
| 44 | C  | 6.586485 | -1.55572 | -0.19969 |
| 45 | C  | 5.517083 | -0.58232 | -0.25403 |
| 46 | C  | 5.679147 | 0.799945 | -0.04633 |
| 47 |    | 4.682025 | 1.797505 | -0.11381 |
| 48 | N  | 3.33619  | 1.601554 | -0.23597 |
| 49 | C  | 2.754802 | 2.840502 | -0.44639 |
| 50 | C  | 3.806848 | 3.8496   | -0.40771 |
| 51 | C  | 4.979245 | 3.214891 | -0.17295 |
| 52 | H  | 5.960109 | 3.658962 | -0.08532 |
| 53 | H  | 3.659151 | 4.912458 | -0.52378 |

---

|    |   |          |          |          |
|----|---|----------|----------|----------|
| 54 | C | 1.416327 | 3.218719 | -0.70138 |
| 55 | C | 0.169603 | 2.556902 | -0.56568 |
| 56 | C | -1.08169 | 3.13108  | -0.82184 |
| 57 | C | -2.08866 | 2.201275 | -0.46977 |
| 58 | C | -3.46945 | 2.346992 | -0.70168 |
| 59 | C | -4.39319 | 1.271455 | -0.76994 |
| 60 | N | -4.05308 | -0.05002 | -0.65194 |
| 61 | C | -5.16581 | -0.79078 | -0.98179 |
| 62 | C | -5.17244 | -2.1876  | -1.21554 |
| 63 | C | -3.98329 | -2.92556 | -1.42195 |
| 64 | S | -2.48743 | -2.10561 | -1.77476 |
| 65 | C | -1.55549 | -3.5781  | -1.64235 |
| 66 | C | -0.15791 | -3.3864  | -1.49992 |
| 67 | S | 1.131018 | -4.57786 | -1.55324 |
| 68 | C | 2.332972 | -3.33265 | -1.09185 |
| 69 | C | 3.700506 | -3.59749 | -0.97043 |
| 70 | C | 4.199613 | -4.99358 | -1.12846 |
| 71 | C | 3.918696 | -5.97897 | -0.17458 |
| 72 | F | 3.214974 | -5.66982 | 0.925614 |
| 73 | C | 4.358372 | -7.29215 | -0.31781 |
| 74 | F | 4.07831  | -8.20811 | 0.614806 |
| 75 | C | 5.105109 | -7.64691 | -1.43936 |
| 76 | F | 5.534368 | -8.9015  | -1.58588 |
| 77 | C | 5.40473  | -6.68965 | -2.40638 |
| 78 | C | 4.950875 | -5.3828  | -2.24368 |
| 79 | F | 5.249985 | -4.48848 | -3.19321 |
| 80 | F | 6.118556 | -7.03152 | -3.48328 |
| 81 | C | 1.721542 | -2.07652 | -0.8999  |
| 82 | C | 0.364081 | -2.12752 | -1.16494 |
| 83 | H | -0.2797  | -1.27364 | -1.02931 |
| 84 | C | -2.41276 | -4.68251 | -1.4698  |
| 85 | H | -2.05188 | -5.69822 | -1.34923 |
| 86 | C | -3.75112 | -4.31947 | -1.34729 |

---

|     |   |          |          |          |
|-----|---|----------|----------|----------|
| 87  | H | -4.5412  | -5.02633 | -1.12259 |
| 88  | C | -6.47246 | -2.89989 | -1.26518 |
| 89  | C | -7.41861 | -2.7843  | -0.23181 |
| 90  | F | -7.1715  | -2.02097 | 0.834341 |
| 91  | C | -8.63527 | -3.46197 | -0.26705 |
| 92  | F | -9.50793 | -3.33569 | 0.737649 |
| 93  | C | -8.94191 | -4.28081 | -1.35093 |
| 94  | C | -8.02983 | -4.41474 | -2.39528 |
| 95  | C | -6.82012 | -3.72903 | -2.34483 |
| 96  | F | -5.98857 | -3.86787 | -3.3865  |
| 97  | F | -8.32699 | -5.18795 | -3.44538 |
| 98  | F | -10.1054 | -4.93201 | -1.39109 |
| 99  | C | -6.27423 | 0.103833 | -1.22916 |
| 100 | C | -5.79552 | 1.37612  | -1.11495 |
| 101 | H | -6.34032 | 2.29565  | -1.27619 |
| 102 | H | -7.26693 | -0.19702 | -1.53506 |
| 103 | C | -3.95857 | 3.723484 | -0.99897 |
| 104 | C | -3.92606 | 4.723131 | -0.01804 |
| 105 | F | -3.47479 | 4.443937 | 1.216581 |
| 106 | C | -4.36665 | 6.020611 | -0.26461 |
| 107 | F | -4.3279  | 6.946241 | 0.699322 |
| 108 | C | -4.85673 | 6.350293 | -1.52646 |
| 109 | C | -4.9003  | 5.382184 | -2.52757 |
| 110 | C | -4.45041 | 4.09168  | -2.2577  |
| 111 | F | -4.49053 | 3.194535 | -3.25116 |
| 112 | F | -5.36062 | 5.700168 | -3.74159 |
| 113 | F | -5.28265 | 7.589705 | -1.77553 |
| 114 | H | -1.26898 | 4.094456 | -1.27085 |
| 115 | C | 1.275082 | 4.62495  | -1.22827 |
| 116 | C | 0.92763  | 5.708315 | -0.41827 |
| 117 | F | 0.7389   | 5.531398 | 0.898452 |
| 118 | C | 0.781481 | 6.996642 | -0.92846 |
| 119 | F | 0.45626  | 8.013228 | -0.12194 |

---

|     |    |          |          |          |
|-----|----|----------|----------|----------|
| 120 | C  | 0.979614 | 7.223767 | -2.28872 |
| 121 | C  | 1.32405  | 6.163897 | -3.12465 |
| 122 | C  | 1.46702  | 4.88543  | -2.58878 |
| 123 | F  | 1.799037 | 3.889108 | -3.41904 |
| 124 | F  | 1.514809 | 6.379145 | -4.42994 |
| 125 | F  | 0.841144 | 8.453614 | -2.78846 |
| 126 | C  | 7.072077 | 1.27574  | 0.223401 |
| 127 | C  | 7.442626 | 1.74328  | 1.489104 |
| 128 | F  | 6.546254 | 1.760591 | 2.484898 |
| 129 | C  | 8.730759 | 2.198273 | 1.7613   |
| 130 | F  | 9.053415 | 2.635628 | 2.983374 |
| 131 | C  | 9.689373 | 2.19082  | 0.750396 |
| 132 | F  | 10.92744 | 2.622732 | 0.999714 |
| 133 | C  | 9.353162 | 1.731524 | -0.52134 |
| 134 | C  | 8.057076 | 1.285139 | -0.77044 |
| 135 | F  | 7.765871 | 0.858286 | -2.00598 |
| 136 | F  | 10.27147 | 1.729217 | -1.49334 |
| 137 | H  | 7.62001  | -1.33671 | 0.024779 |
| 138 | Cl | -3.9178  | -2.13632 | 1.935169 |

**5**

| Row | Symbol | X         | Y         | Z         |
|-----|--------|-----------|-----------|-----------|
| 1   | C      | -2.941147 | 2.534897  | -0.422536 |
| 2   | C      | -1.751607 | 3.283875  | -0.452037 |
| 3   | C      | 0.619674  | 4.222112  | -0.309481 |
| 4   | C      | 1.999922  | 4.472137  | -0.158638 |
| 5   | C      | 3.00448   | 3.497426  | 0.038245  |
| 6   | N      | 2.811218  | 2.146315  | -0.043034 |
| 7   | C      | 3.975709  | 1.455886  | 0.194283  |
| 8   | C      | 4.03447   | 0.040502  | 0.155662  |
| 9   | C      | 2.891463  | -0.730066 | -0.147037 |
| 10  | N      | 1.697291  | -0.113389 | -0.479931 |
| 11  | C      | 0.767736  | -1.046988 | -0.595654 |

---

|    |   |           |           |           |
|----|---|-----------|-----------|-----------|
| 12 | C | 1.366076  | -2.41044  | -0.331157 |
| 13 | C | 0.780702  | -3.703728 | -0.316882 |
| 14 | C | -0.566211 | -4.072917 | -0.184432 |
| 15 | N | -1.660118 | -3.252774 | 0.022709  |
| 16 | C | -2.749597 | -4.036063 | 0.2626    |
| 17 | C | -3.97988  | -3.380508 | 0.49521   |
| 18 | N | -3.992076 | -2.027256 | 0.298281  |
| 19 | C | -5.270132 | -1.569716 | 0.485822  |
| 20 | C | -6.089194 | -2.698767 | 0.845581  |
| 21 | C | -5.28923  | -3.818916 | 0.847882  |
| 22 | C | -5.698832 | -0.240468 | 0.260685  |
| 23 | C | -4.874588 | 0.860239  | -0.009518 |
| 24 | C | -5.260089 | 2.108368  | -0.548678 |
| 25 | C | -4.227261 | 2.993601  | -0.780915 |
| 26 | C | -7.170702 | 0.00679   | 0.238828  |
| 27 | C | -7.785752 | 0.832833  | 1.188991  |
| 28 | C | -9.158368 | 1.067782  | 1.185251  |
| 29 | C | -9.955945 | 0.468992  | 0.212258  |
| 30 | C | -9.375946 | -0.355889 | -0.749068 |
| 31 | C | -8.000358 | -0.574678 | -0.72911  |
| 32 | C | -2.376348 | -5.415589 | 0.204575  |
| 33 | C | -1.038442 | -5.44129  | -0.081823 |
| 34 | C | 1.763854  | -4.835973 | -0.368944 |
| 35 | C | 2.436152  | -5.146443 | -1.55625  |
| 36 | C | 3.371759  | -6.175911 | -1.625064 |
| 37 | C | 3.660789  | -6.919599 | -0.482505 |
| 38 | C | 3.012271  | -6.631054 | 0.716042  |
| 39 | C | 2.078017  | -5.598109 | 0.760555  |
| 40 | C | 2.716783  | -2.140838 | -0.086695 |
| 41 | C | 5.321712  | -0.634844 | 0.463485  |
| 42 | C | 5.955877  | -1.464474 | -0.471935 |
| 43 | C | 7.158209  | -2.110293 | -0.193874 |
| 44 | C | 7.766607  | -1.931533 | 1.046211  |

---

|    |    |            |           |           |
|----|----|------------|-----------|-----------|
| 45 | C  | 7.165651   | -1.111749 | 1.998494  |
| 46 | C  | 5.959702   | -0.481839 | 1.702133  |
| 47 | C  | 4.982023   | 2.44095   | 0.454874  |
| 48 | C  | 4.392874   | 3.681221  | 0.357433  |
| 49 | C  | 2.450875   | 5.892598  | -0.230129 |
| 50 | C  | 3.304309   | 6.34148   | -1.247203 |
| 51 | C  | 3.742082   | 7.662077  | -1.315904 |
| 52 | C  | 3.320937   | 8.577944  | -0.354504 |
| 53 | C  | 2.468518   | 8.166407  | 0.667843  |
| 54 | C  | 2.04806    | 6.839893  | 0.721218  |
| 55 | C  | -0.362354  | 5.156469  | -0.726465 |
| 56 | C  | -1.642051  | 4.649951  | -0.810668 |
| 57 | H  | -6.291617  | 2.322555  | -0.799744 |
| 58 | Pd | -2.174145  | -1.293167 | -0.22594  |
| 59 | S  | -3.11776   | 0.911626  | 0.300218  |
| 60 | S  | -0.170219  | 2.665297  | -0.012145 |
| 61 | H  | 1.996965   | 1.581229  | -0.349429 |
| 62 | O  | -0.411358  | -0.738479 | -0.993512 |
| 63 | H  | -7.141268  | -2.650289 | 1.089654  |
| 64 | H  | -5.581883  | -4.836295 | 1.0701    |
| 65 | H  | -4.380913  | 3.977686  | -1.208019 |
| 66 | F  | 3.989234   | -6.457404 | -2.776848 |
| 67 | F  | -7.052467  | 1.418443  | 2.143901  |
| 68 | F  | -9.714776  | 1.85588   | 2.110944  |
| 69 | F  | -11.272074 | -0.686693 | -0.200218 |
| 70 | F  | -10.139416 | -0.922471 | -1.688953 |
| 71 | F  | -7.477931  | -1.35763  | -1.680346 |
| 72 | H  | -3.036315  | -6.258474 | 0.359473  |
| 73 | H  | -0.422568  | -6.318757 | -0.216043 |
| 74 | F  | 2.177965   | -4.453316 | -2.671143 |
| 75 | F  | 4.555786   | -7.908424 | -0.537024 |
| 76 | F  | 3.291535   | -7.342045 | 1.814191  |
| 77 | F  | 1.476933   | -5.34352  | 1.930851  |

---

|    |   |           |           |           |
|----|---|-----------|-----------|-----------|
| 78 | H | 3.476597  | -2.862604 | 0.176958  |
| 79 | F | 5.414599  | -1.651426 | -1.682496 |
| 80 | F | 7.736093  | -2.89107  | -1.113066 |
| 81 | F | 8.920606  | -2.543109 | 1.321026  |
| 82 | F | 7.742504  | -0.943715 | 3.19343   |
| 83 | F | 5.407257  | 0.284728  | 2.652973  |
| 84 | H | 6.016242  | 2.232843  | 0.688289  |
| 85 | H | 4.870164  | 4.637597  | 0.516513  |
| 86 | F | 3.719114  | 5.495967  | -2.198557 |
| 87 | F | 4.553452  | 8.057209  | -2.30242  |
| 88 | F | 3.731854  | 9.845968  | -0.412865 |
| 89 | F | 2.067948  | 9.042903  | 1.594843  |
| 90 | F | 1.238038  | 6.480879  | 1.724906  |
| 91 | H | -0.110193 | 6.178935  | -0.97996  |
| 92 | H | -2.49606  | 5.242719  | -1.116171 |

---

## References

1. D. Wu, A. B. Descalzo, F. Weik, F. Emmerling, Z. Shen, X.-Z. You and K. Rurack, *Angew. Chem., Int. Ed.*, 2008, **47**, 193-197.
2. M. Toganoh, S. Gokulnath, Y. Kawabe and H. Furuta, *Chem. -Eur. J.*, 2012, **18**, 4380-4391.
3. G. Sheldrick, *SHELXTI93, Program for crystal structure refinement*, 1997.
4. H. Puschmann, L. Bourhis, R. Gildea and O. Dolomanov, *Acta Crystallogr., Sect. A: Found. Crystallogr.*, 2009, **65**, 315-316.
5. G. Sheldrick, *Acta Crystallogr., Sect. A*, 2008, **64**, 112-122.
6. G. Sheldrick, *Acta Crystallogr., Sect. C*, 2015, **71**, 3-8.
7. I. Y. Zhang, J. Wu and X. Xu, *Chem. Commun.*, 2010, **46**, 3057-3070.
8. G. A. Petersson and M. A. Al - Laham, *J. Chem. Phys.*, 1991, **94**, 6081-6090.
9. Z. Chen, C. S. Wannere, C. Corminboeuf, R. Puchta and P. v. R. Schleyer, *Chem. Rev.*, 2005, **105**, 3842-3888.
10. P. v. R. Schleyer, C. Maerker, A. Dransfeld, H. Jiao and N. J. R. van Eikema Hommes, *J. Am. Chem. Soc.*, 1996, **118**, 6317-6318.
11. T. A. Keith and R. F. W. Bader, *Chem. Phys. Lett.*, 1992, **194**, 1-8.
12. J. P. Perdew, K. Burke and M. Ernzerhof, *Phys. Rev. Lett.*, 1996, **77**, 3865-3868.
13. F. J. Luque, J. M. López and M. Orozco, *Theor. Chem. Acc.*, 2000, **103**, 343-345.
